# Supplementary material for: A magnetic porous chitosan-based palladium catalyst: a green, highly efficient and reusable catalyst for Mizoroki–Heck reaction in aqueous media
Source: Royal Society of Chemistry journal article supplement (doi:10.1039/c5nj01337b), 2015-01-01
Supplement: c5nj01337b1.pdf [file c5nj01337b1.pdf]

## Supplementary Materials

### **Magnetic porous chitosan-based palladium catalyst: A green, highly efficient and reusable catalyst for Mizoroki-Heck reaction in aqueous media**

Barahman Movassagh,\* Nasrin Rezaei

*Department of Chemistry, K. N. Toosi University of Technology, P. O. Box 16315-1618, Tehran, Iran*

---

| <b>Table of Contents</b>                                                                  |  | <b>Page</b> |
|-------------------------------------------------------------------------------------------|--|-------------|
| <b>1. Experimental Procedure</b>                                                          |  | <b>2</b>    |
| 1.1. General                                                                              |  | 2           |
| 1.2. Preparation of PCS-TI (1) and its characterizations                                  |  | 2           |
| 1.3. Preparation of PCS-TI/Pd (2) and its characterizations                               |  | 6           |
| 1.4. Preparation of MPCS-TI/Pd (3) and its characterizations                              |  | 9           |
| 1.5. General procedure for Mizoroki-Heck coupling reaction                                |  | 21          |
| <b>2. Spectral data for Table 2</b>                                                       |  | <b>22</b>   |
| <b>3. Copy of <sup>1</sup>H- and <sup>13</sup>C-NMR spectra of Mizoroki-Heck products</b> |  | <b>26</b>   |
| <b>4. Refrence</b>                                                                        |  | <b>37</b>   |

## 1. Experimental Procedure

### 1.1. General

As received chitosan (CS) powder with average MW = 100000-300000 and the deacetylation degree of 70-85% (from Acros company) was used without further purification. All chemicals were commercial reagent grades and purchased from Merck and Aldrich. Polyethylene glycol (PEG, MW = 10000) was purchased from Aldrich. Thermogravimetric-diffraction thermal analysis (TG-DTA) was carried out using a thermal gravimetric analysis instrument (NETZSCH TG 209 F1 Iris) with a heating rate of 10 °C min<sup>-1</sup>. XRD patterns were recorded by an EQUINOX 3000, X-ray diffractometer using Cu K $\alpha$  radiation. XPS (X-Ray photoelectron spectroscopy) data was recorded with 8025-BesTec twin anode XR3E2 X-ray source system. <sup>1</sup>H NMR (300 MHz) and <sup>13</sup>C NMR (75 MHz) spectra were recorded using a Bruker AQS-300 Avance spectrometer. Transmission electron microscope, TEM (Zeiss - EM10C - 80 KV) was used to obtain TEM images. The scanning electron microscopy (SEM) images were obtained using a scanning electron microscope MIRA3\TESCAN-LMU. The magnetic measurement of samples were carried out in a vibrating sample magnetometer (VSM) (4 inch, Daghigh Meghnatis Kashan Co., Kashan, Iran) at room temperature. FT-IR spectra were obtained using a Shimadzu model FT-IR 8400 instrument. The Pd content of the complex was determined using inductively coupled plasma (ICP, Varian vista-mpx), and surface morphology of the catalyst was analyzed using Energy-dispersive-X-ray (MIRA3, TESCAN-LMU) equipped with EDX facility. Micro analytical data was collected by a Perkin-Elmer, USA, 2400C elemental analyzer. The N<sub>2</sub>-sorption was carried out in a Belsorp-mini-BEL Japan, Inc. at 298 K.

### 1.2. Preparation of porous chitosan-thienyl imine support, PCS-TI (1) and its characterization

In a 200 mL round-bottom flask equipped with a magnetic stirring bar, chitosan (1 g) was allowed to dissolve slowly in aqueous acetic acid solution (0.87 M, 100 mL), for 1 h at room temperature; then PEG (1 g) was added to the above flask and stirred for 10 min, followed by addition of 2-thiophenecarbaldehyde (2.24 g, 20 mmol) and the mixture was stirred for 24 h under N<sub>2</sub> atmosphere. The reaction mixture was dripped into a 1 N NaOH aqueous solution (250 mL) through a needle of 0.9 mm diameter. The gelatine like CS-TI was collected and washed with hot distilled water until neutral (pH ~ 7), followed by extraction of the PEG component with about 2 liters of hot water (Scheme 1). Similarly, the bead chitosan-supported ligand (BCS-TI) was prepared by the same protocol in the absence of PEG. Also, the normal chitosan-supported ligand (NCS-TI) was produced by mixing chitosan and 2-thiophenecarbaldehyde in EtOH (10 mL).

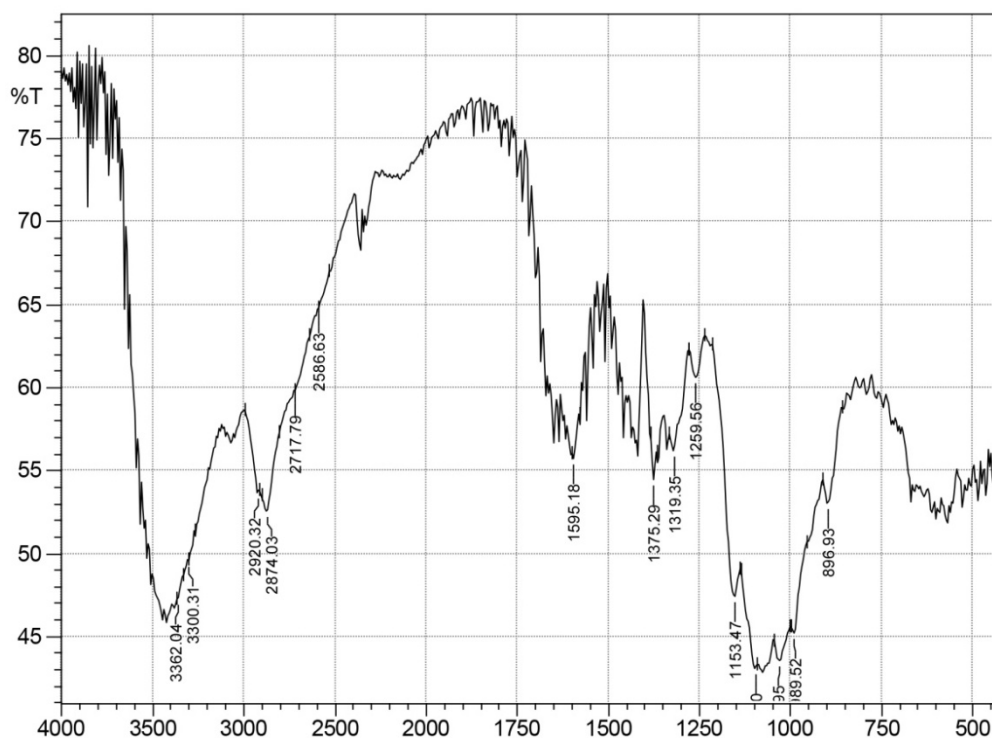

**Figure S1.** IR (KBr disc) spectrum of chitosan.

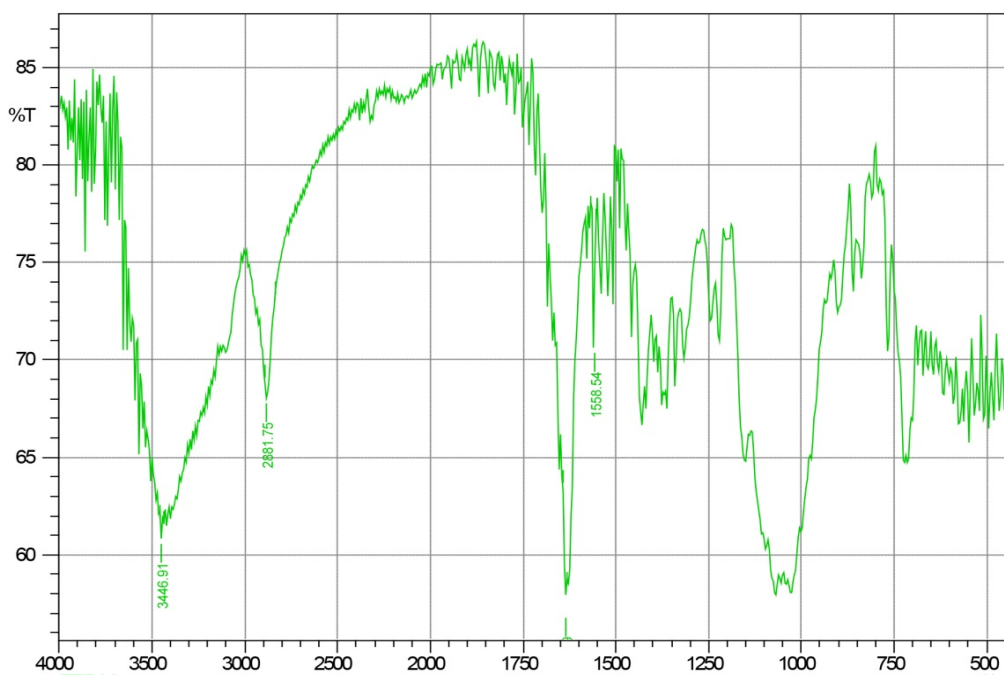

**Figure S2.** IR (KBr disc) spectrum of PCS-TI (1).

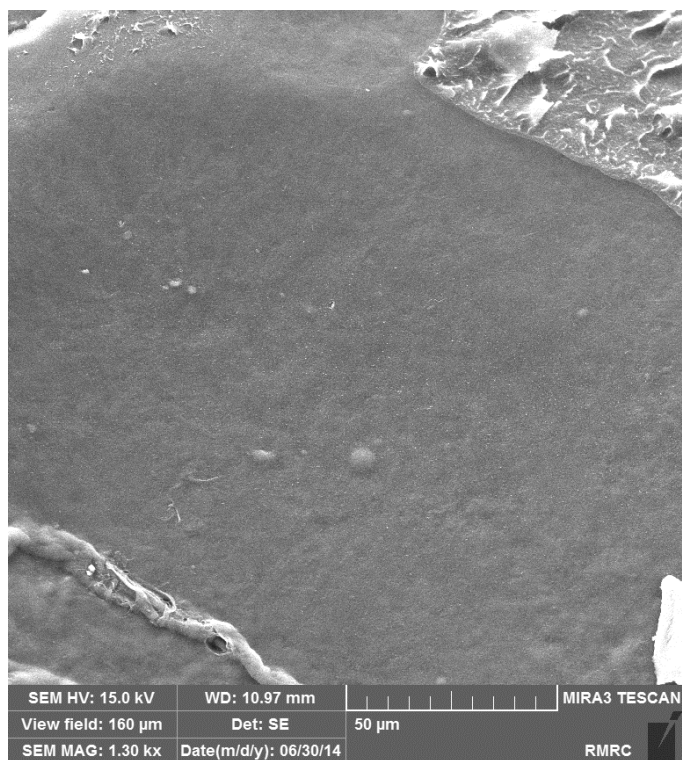

**Figure S3.** SEM image of NCS-TI.

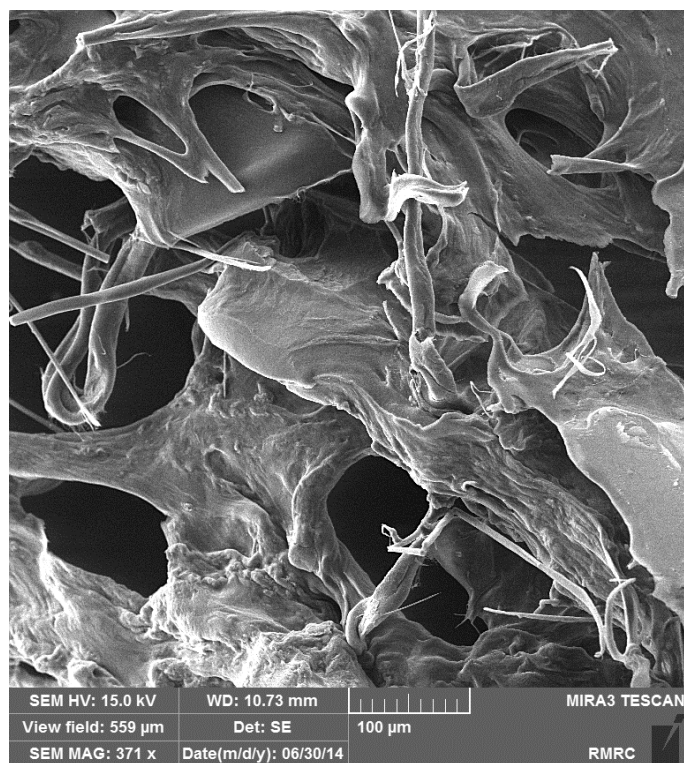

**Figure S4.** SEM image of PCS-TI (1).

### IDFix report

**Company:** Razi Metalurgical Research Center  
**User Name:** Dehghani  
**USER\_TITLE\_TITLE:** USER\_TITLE  
**File:** C:\Report\10356\79.ana  
**Last Saved:** 6/30/2014 3:01 PM  
**COMMENTS\_TITLE:** COMMENTS

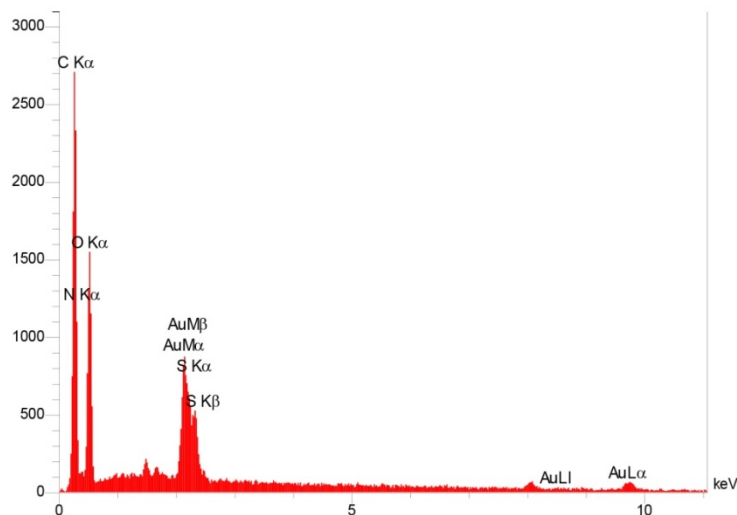

#### Quantitative Results

| Elt | LiLine | Int   | Error   | K      | Kr     | W%     | A%     | ZAF    | Formula | Ox%  | Pk/Bg | Class | LConf | HConf | Cat# |
|-----|--------|-------|---------|--------|--------|--------|--------|--------|---------|------|-------|-------|-------|-------|------|
| C   | Ka     | 194.8 | 21.9233 | 0.4983 | 0.2071 | 41.35  | 59.01  | 0.4891 |         | 0.00 | 78.09 | A     | 41.45 | 43.25 | 0.00 |
| N   | Ka     | 8.6   | 21.9233 | 0.0296 | 0.0123 | 7.60   | 9.18   | 0.1620 |         | 0.00 | 5.20  | A     | 6.83  | 8.37  | 0.00 |
| O   | Ka     | 121.3 | 21.9233 | 0.1546 | 0.0642 | 26.06  | 28.02  | 0.2374 |         | 0.00 | 37.02 | A     | 26.33 | 27.79 | 0.00 |
| S   | Ka     | 39.4  | 1.4186  | 0.0236 | 0.0098 | 3.17   | 1.92   | 0.8365 |         | 0.00 | 4.33  | A     | 1.12  | 1.23  | 0.00 |
| Au  | La     | 5.9   | 0.4941  | 0.2939 | 0.1222 | 21.81  | 1.87   | 0.5599 |         | 0.00 | 3.48  | B     | 19.15 | 24.48 | 0.00 |
|     |        |       |         | 1.0000 | 0.4156 | 100.00 | 100.00 |        |         | 0.00 |       |       |       |       | 0.00 |

Figure S5. EDX spectrum of PCS-TI (1).

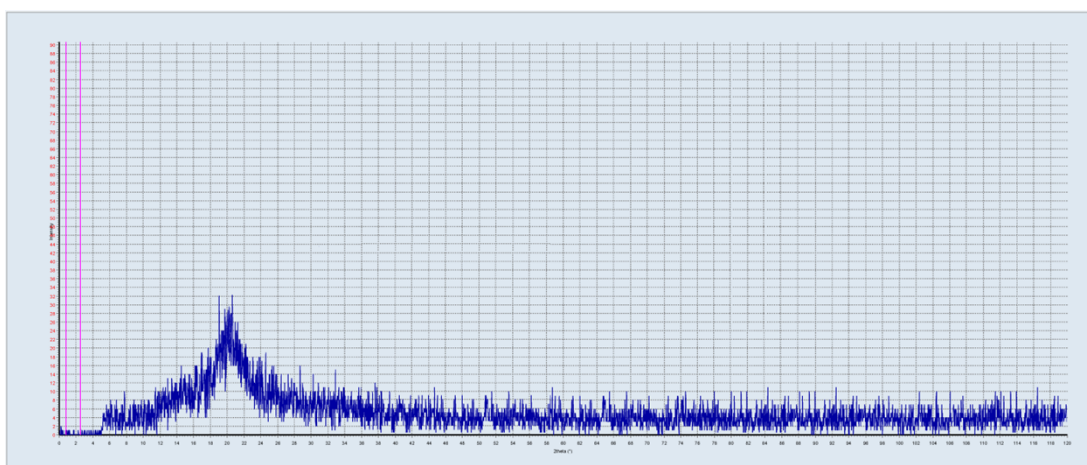

Figure S6. Powder XRD pattern of PCS-TI (1).

### 1.3. Preparation and characterization of porous chitosan-thienyl imine Pd complex,

#### PCS-TI/Pd (2)

In a 50 mL round-bottom flask, PdCl<sub>2</sub> (0.088 g, 0.5 mmol) was added to PCS-TI (1) in EtOH (30 mL). The mixture was heated at reflux for 24 h. The product formed was filtered off, washed with EtOH and finally dried in vacuum for 24 h at 50 °C (Scheme 1). Similarly, the bead and normal chitosan-thienyl Pd complexes (BCS-TI/Pd and NCS-TI/Pd) were prepared by the same protocol.

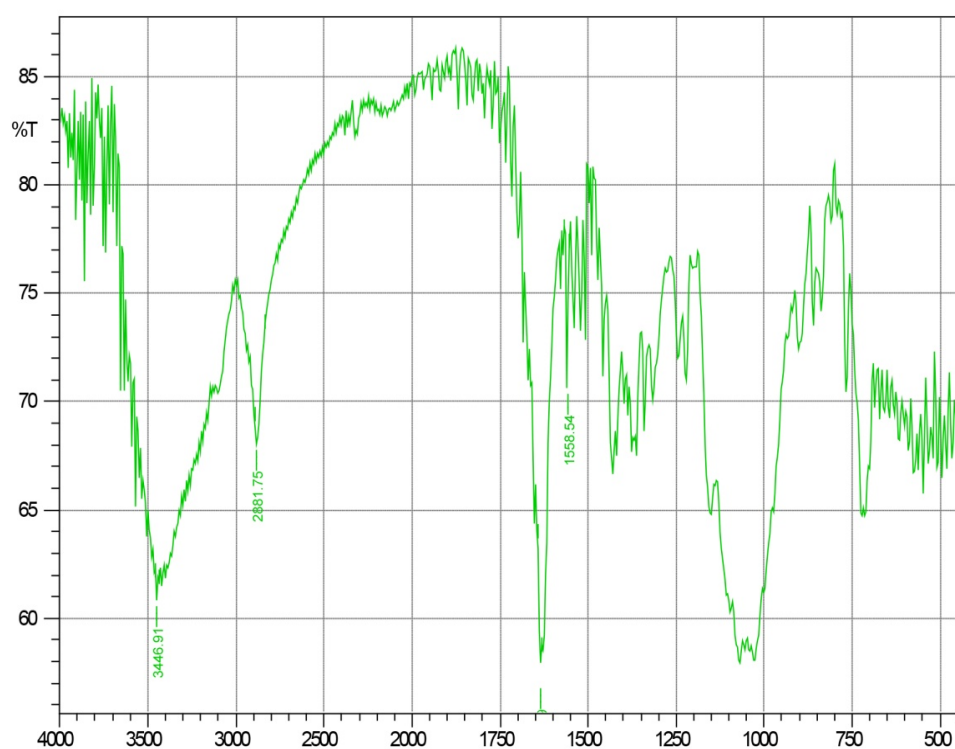

Figure S7. IR (KBr) spectrum of PCS-TI/Pd (2).

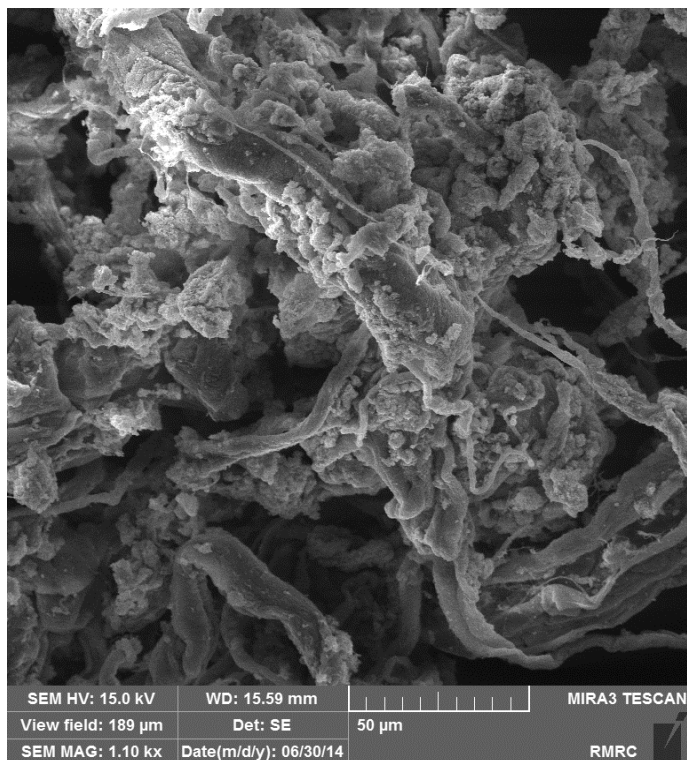

**Figure S8.** SEM image of PCS-TI/Pd (2).

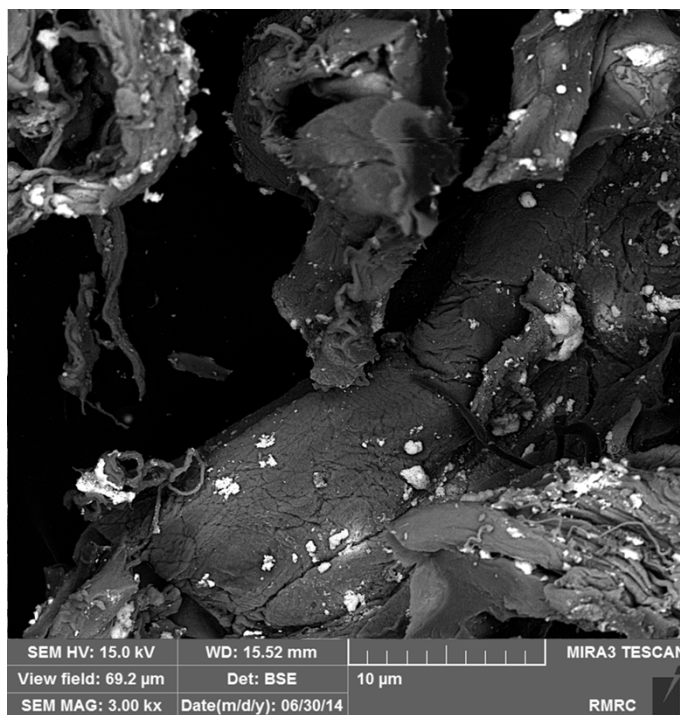

**Figure S9.** SEM image of PCS-TI/Pd (2) (distribution of palladium).

### IDFix report

**Company:** Razi Metallurgical Research Center  
**User Name:** Dehghani  
**USER\_TITLE\_TITLE:** USER\_TITLE  
**File:** C:\Report\10356\80-2.ana  
**Last Saved:** 6/30/2014 2:59 PM  
**COMMENTS\_TITLE:** COMMENTS

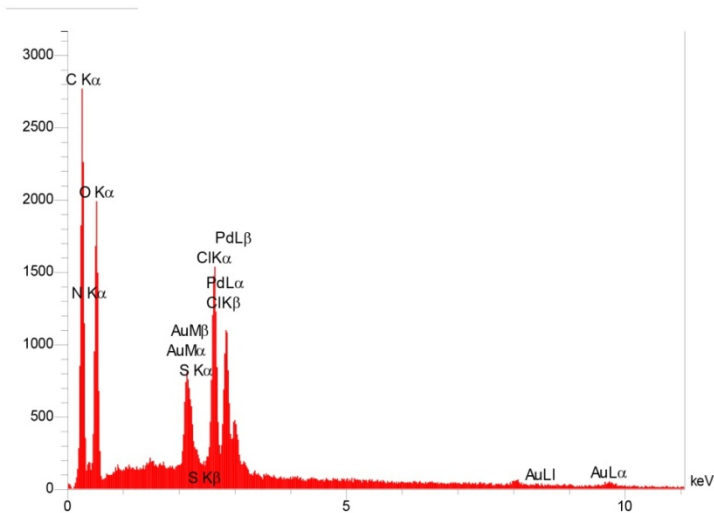

#### Quantitative Results

| Elt | Line | Int   | Error   | K      | Kr     | W%     | A%     | ZAF    | Formula | Ox%  | Pk/Bg  | Class | LConf | HConf | Cat# |
|-----|------|-------|---------|--------|--------|--------|--------|--------|---------|------|--------|-------|-------|-------|------|
| C   | Ka   | 197.6 | 29.0647 | 0.4367 | 0.1679 | 39.37  | 54.29  | 0.4212 |         | 0.00 | 119.85 | A     | 39.03 | 40.72 | 0.00 |
| N   | Ka   | 13.2  | 29.0647 | 0.0393 | 0.0151 | 8.92   | 10.58  | 0.1523 |         | 0.00 | 7.25   | A     | 9.11  | 10.74 | 0.00 |
| O   | Ka   | 146.3 | 29.0647 | 0.1611 | 0.0620 | 29.09  | 30.15  | 0.2100 |         | 0.00 | 53.19  | A     | 28.77 | 30.22 | 0.00 |
| S   | Ka   | 11.9  | 0.8547  | 0.0062 | 0.0024 | 2.27   | 1.14   | 0.8706 |         | 0.00 | 3.94   | B     | 0.25  | 0.30  | 0.00 |
| Cl  | Ka   | 163.2 | 0.8547  | 0.0935 | 0.0359 | 4.28   | 1.98   | 0.8391 |         | 0.00 | 13.11  | A     | 4.18  | 4.38  | 0.00 |
| Pd  | La   | 107.7 | 0.8547  | 0.1397 | 0.0537 | 7.35   | 1.13   | 0.7307 |         | 0.00 | 11.44  | A     | 7.14  | 7.57  | 0.00 |
| Au  | La   | 2.9   | 0.3529  | 0.1236 | 0.0475 | 8.80   | 0.73   | 0.5403 |         | 0.00 | 2.63   | B     | 7.26  | 10.34 | 0.00 |
|     |      |       |         | 1.0000 | 0.3846 | 100.00 | 100.00 |        |         | 0.00 |        |       |       |       | 0.00 |

Figure S10. EDX spectrum of PCS-TI/Pd (2).

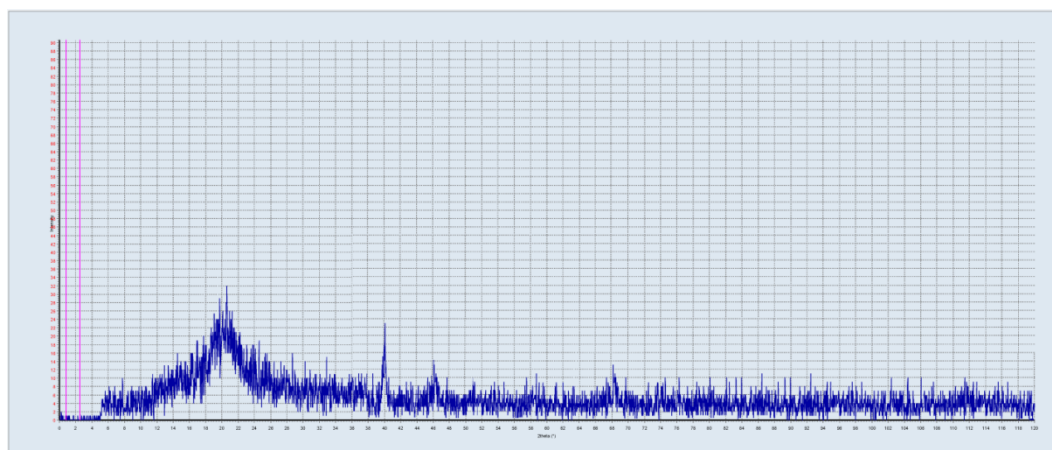

Figure S11. Powder XRD pattern of PCS-TI/Pd (2).



#### 1.4. Preparation and characterization of cross-linked magnetic porous chitosan-thienyl imine Pd complex MPCS-TI/Pd (3)

PCS-TI/Pd (2) was added to aqueous acetic acid solution (0.17 M, 30 mL); a suspension of  $\text{Fe}_3\text{O}_4$  (0.5 g) in glyoxal (3 mL) and EtOH (5 mL) was then added dropwise to the above mixture. More glyoxal (1.5 mL) was added and the reaction mixture was mechanically stirred for 1 h at room temperature. The product formed was collected, washed with water, ethanol, and then dried in vacuum at 50 °C for 24 h (Scheme 1). Similarly, magnetic bead and normal catalysts (MBCS-TI/Pd, MNCS-TI/Pd) were prepared by the same protocol.

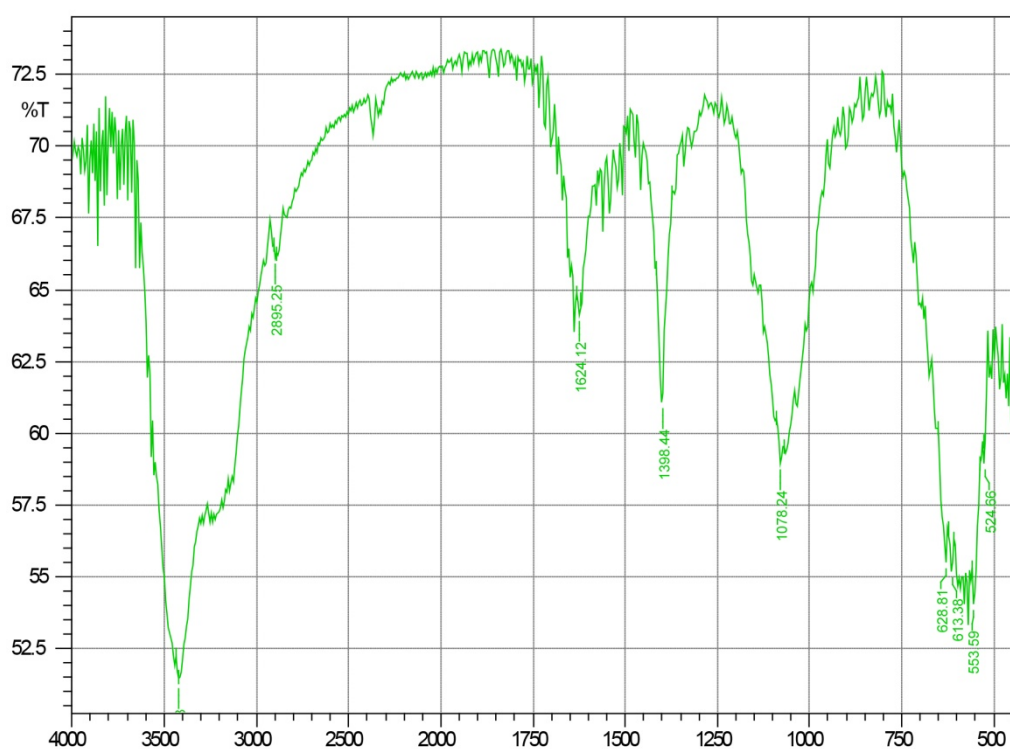

Figure S12. IR (KBr) spectrum of MPCS-TI/Pd (3).

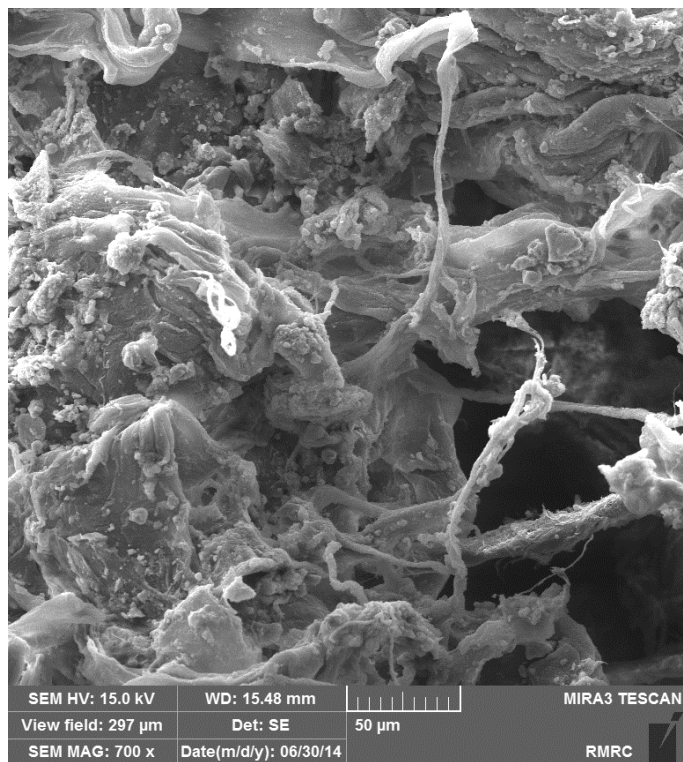

**Figure S13.** SEM image of MPCS-TI/Pd (3).

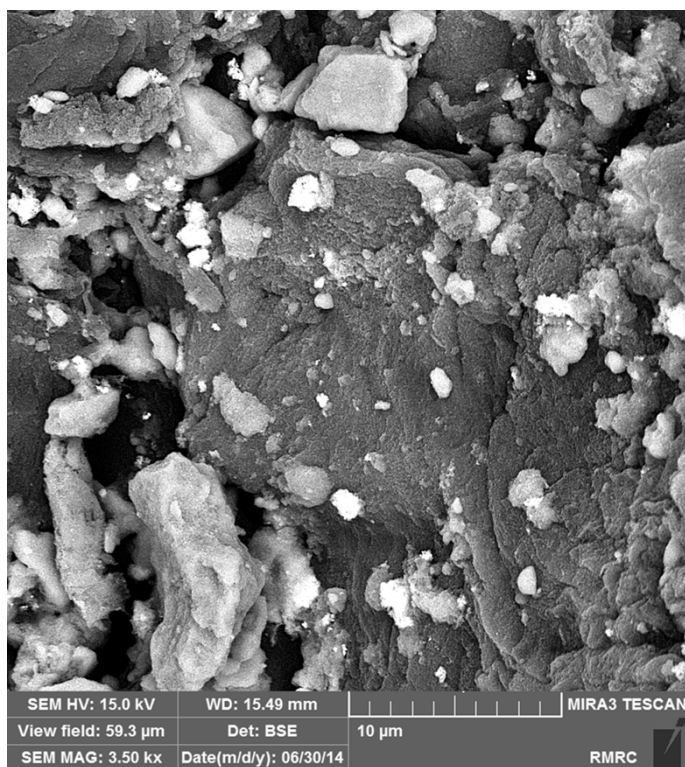

**Figure S14.** SEM image of MPCS-TI/Pd (3) (distribution of nanoparticles).

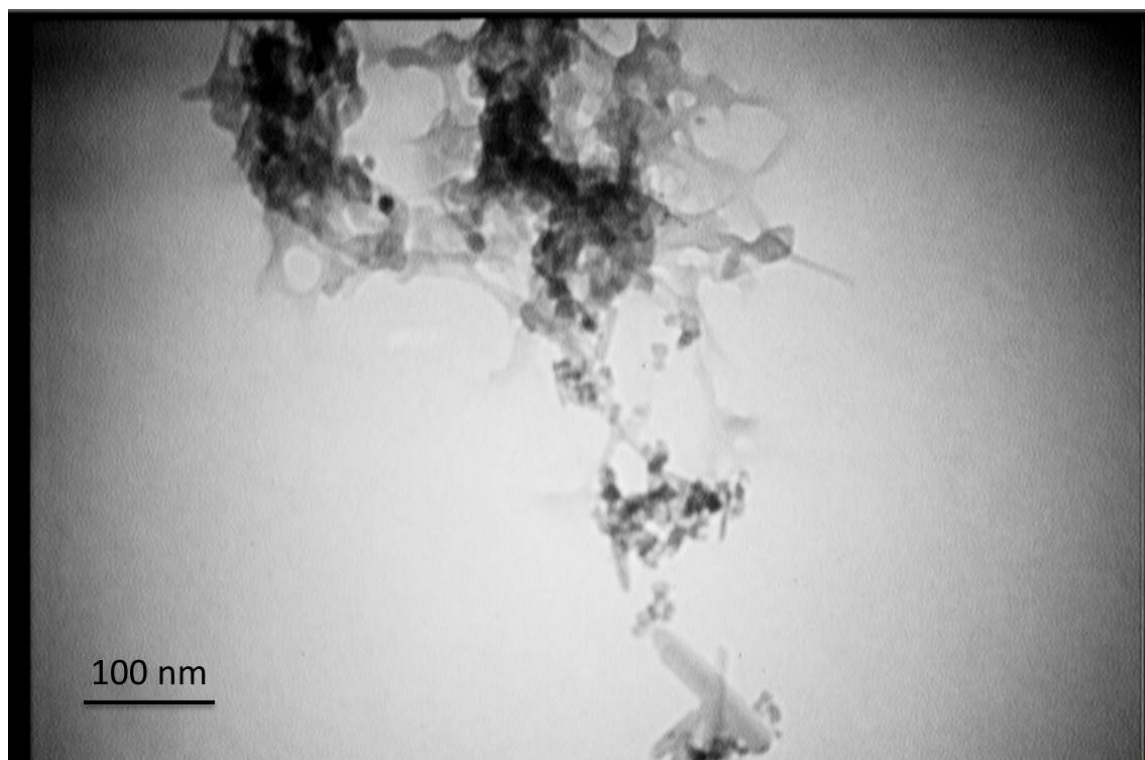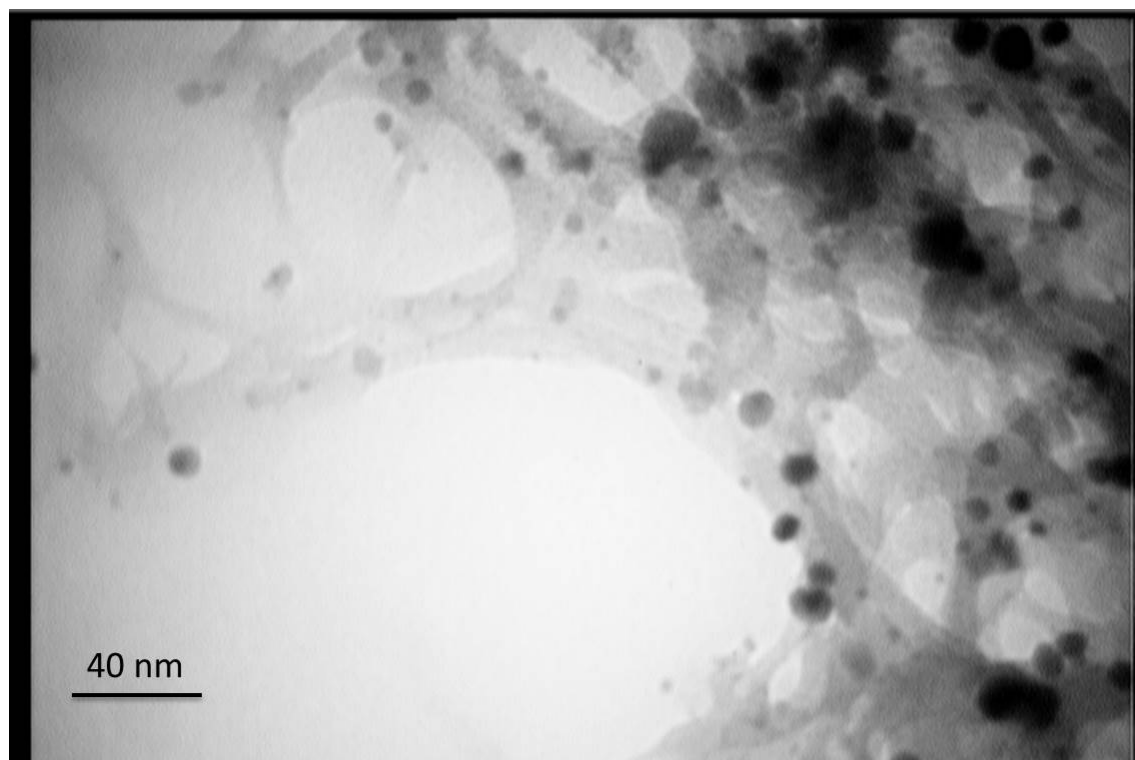

**Figure S15.** TEM image of MPCS-TI/Pd (**3**) before reaction.

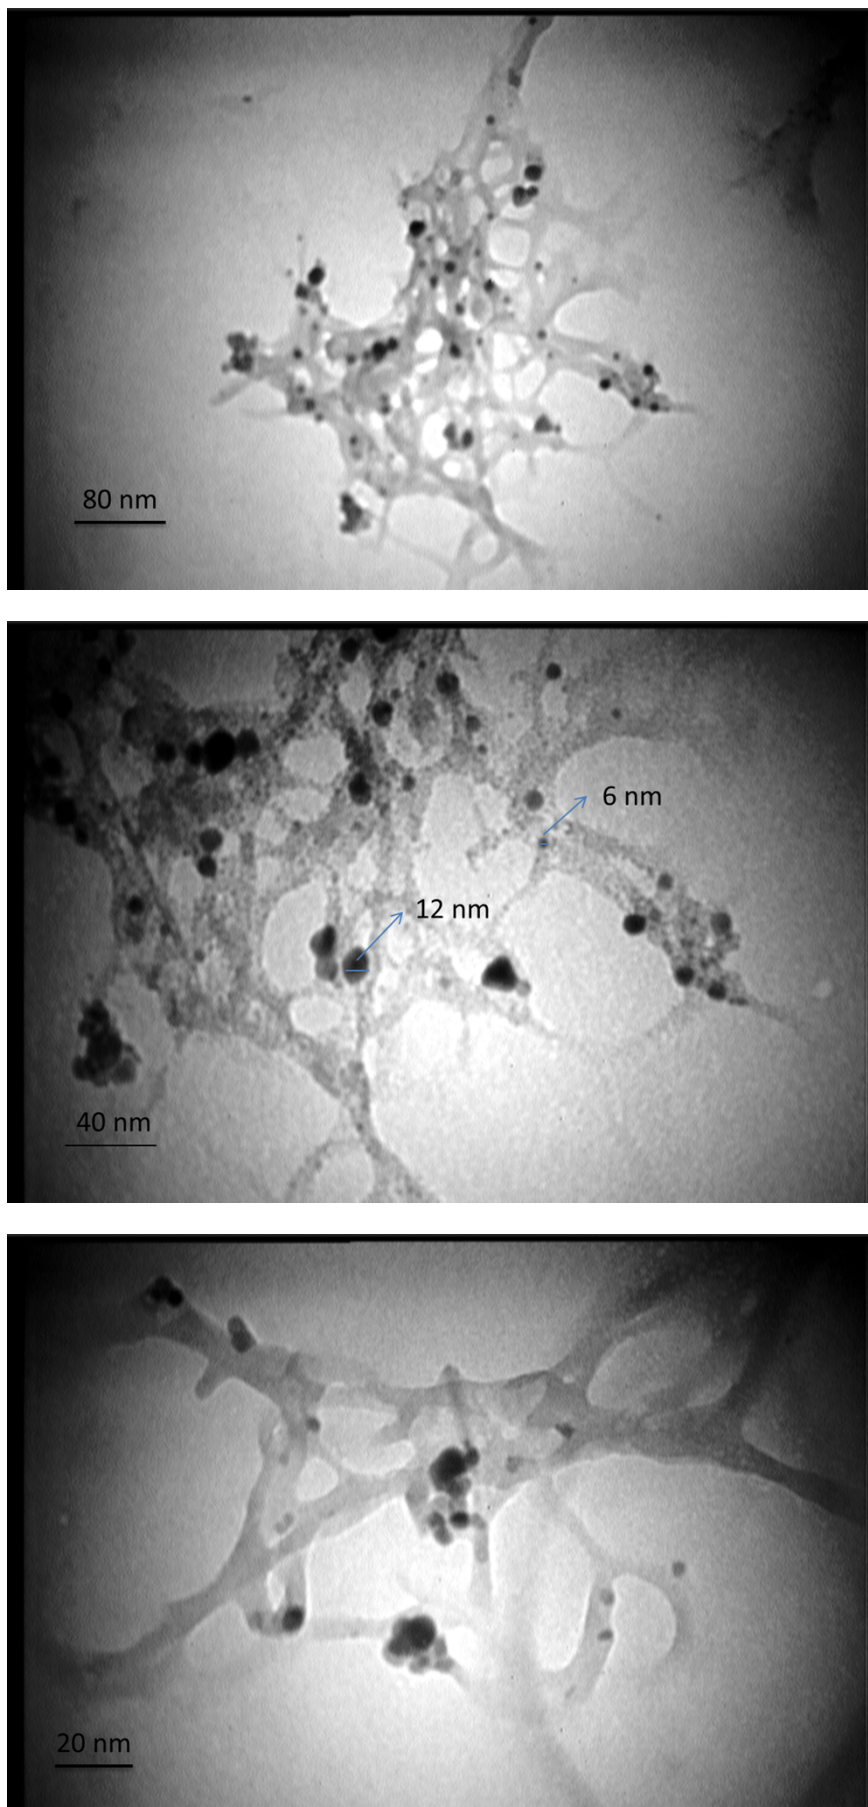

**Figure S16.** TEM image of MPCS-Ti/Pd (**3**) after eight reaction runs.

### IDFix report

**Company:** Razi Metalurgical Research Center  
**User Name:** Dehghani  
**USER\_TITLE\_TITLE:** USER\_TITLE  
**File:** C:\Report\10356\83.ana  
**Last Saved:** 6/30/2014 3:03 PM  
**COMMENTS\_TITLE:** COMMENTS

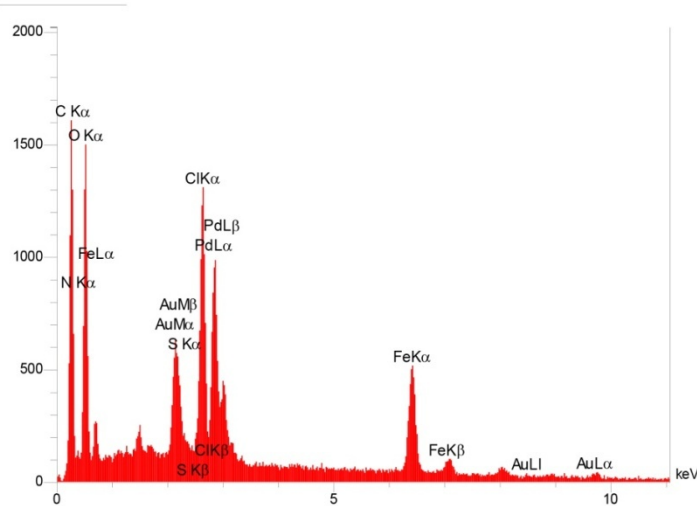

### Quantitative Results

| Elt | Line | Int   | Error   | K      | Kr     | W%     | A%     | ZAF    | Formula | Ox%  | Pk/Bg | Class | LConf | HConf | Cat# |
|-----|------|-------|---------|--------|--------|--------|--------|--------|---------|------|-------|-------|-------|-------|------|
| C   | Ka   | 114.7 | 11.9980 | 0.3065 | 0.1312 | 34.50  | 51.48  | 0.3780 |         | 0.00 | 75.47 | A     | 33.73 | 35.66 | 0.00 |
| N   | Ka   | 8.6   | 11.9980 | 0.0309 | 0.0132 | 6.99   | 9.16   | 0.1655 |         | 0.00 | 5.41  | A     | 7.17  | 8.80  | 0.00 |
| O   | Ka   | 111.8 | 11.9980 | 0.1488 | 0.0637 | 27.73  | 30.90  | 0.2296 |         | 0.00 | 37.07 | A     | 26.95 | 28.52 | 0.00 |
| S   | Ka   | 6.2   | 1.2195  | 0.0039 | 0.0017 | 2.19   | 1.10   | 0.8761 |         | 0.00 | 3.43  | B     | 0.17  | 0.21  | 0.00 |
| Cl  | Ka   | 136.2 | 1.2195  | 0.0943 | 0.0404 | 4.73   | 2.38   | 0.8534 |         | 0.00 | 11.60 | A     | 4.61  | 4.85  | 0.00 |
| Fe  | Ka   | 75.1  | 0.5351  | 0.1738 | 0.0744 | 9.02   | 2.88   | 0.8252 |         | 0.00 | 10.61 | A     | 8.71  | 9.33  | 0.00 |
| Pd  | La   | 98.4  | 1.2195  | 0.1543 | 0.0660 | 8.87   | 1.49   | 0.7440 |         | 0.00 | 10.81 | A     | 8.61  | 9.14  | 0.00 |
| Au  | La   | 1.7   | 0.2885  | 0.0876 | 0.0375 | 6.78   | 0.61   | 0.5533 |         | 0.00 | 2.29  | B     | 5.22  | 8.33  | 0.00 |
|     |      |       |         | 1.0000 | 0.4280 | 100.00 | 100.00 |        |         | 0.00 |       |       |       |       | 0.00 |

Figure S17. EDX spectrum of MPCs-Ti/Pd (3).

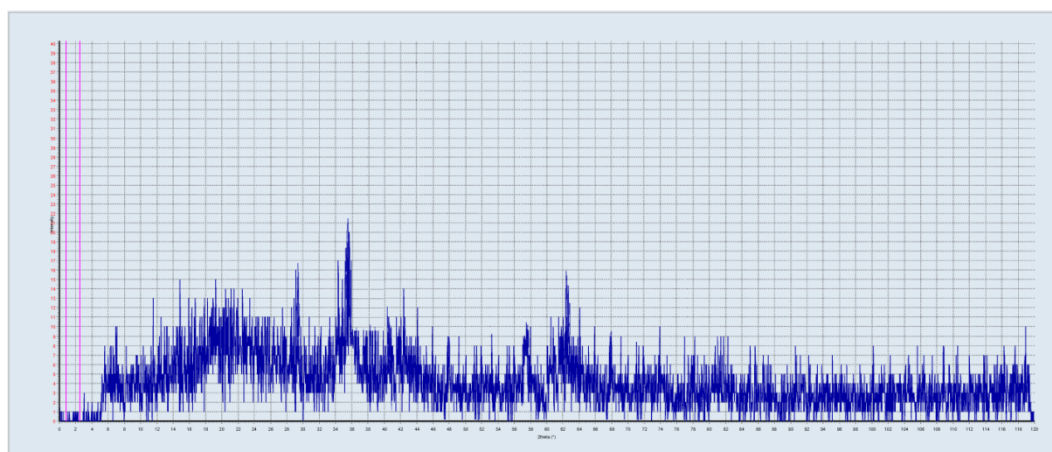

Figure S18. Powder XRD pattern of MPCs-Ti/Pd (3).

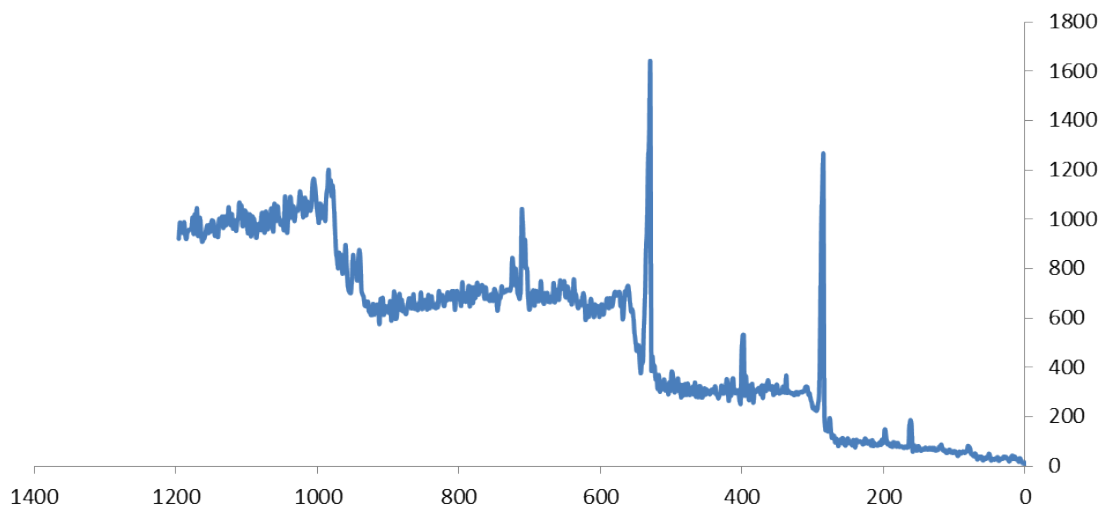

**Figure S19.** XPS spectrum of the MPCS-TI/Pd (**3**), before reaction.

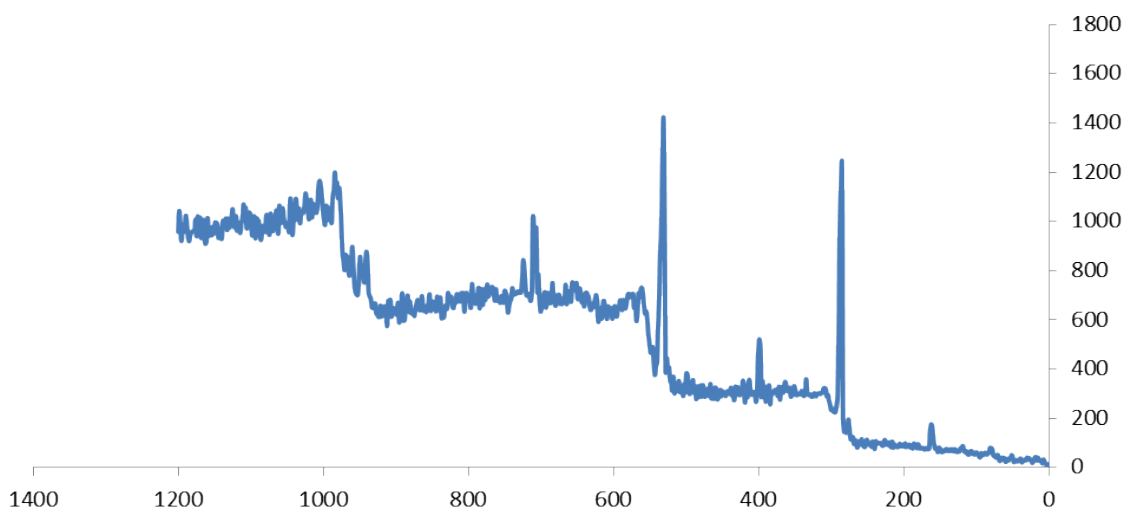

**Figure S20.** XPS spectrum of the MPCS-TI/Pd (**3**), after reaction.

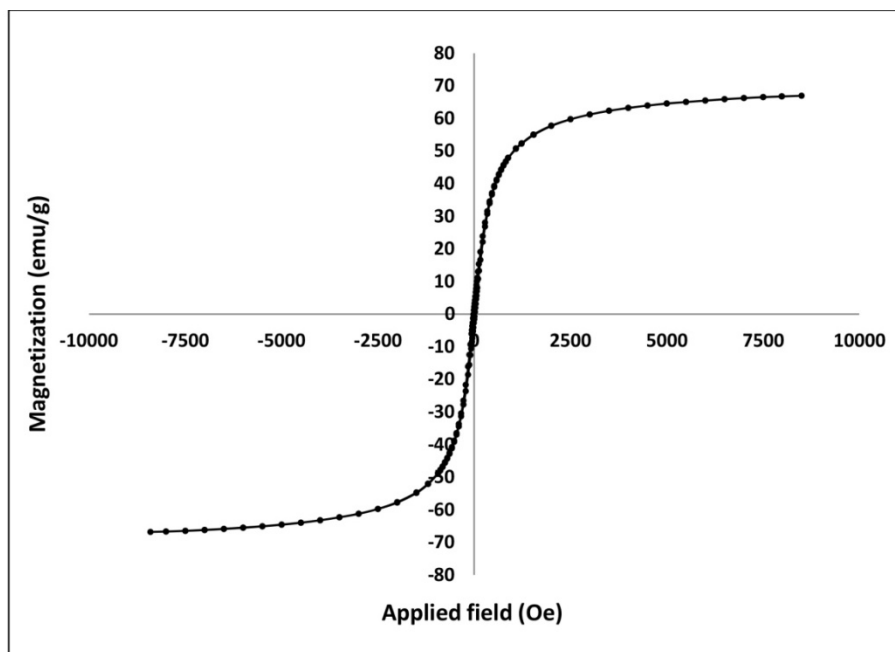

Figure S21. VSM curve for the magnetic Fe<sub>3</sub>O<sub>4</sub> nanoparticles.

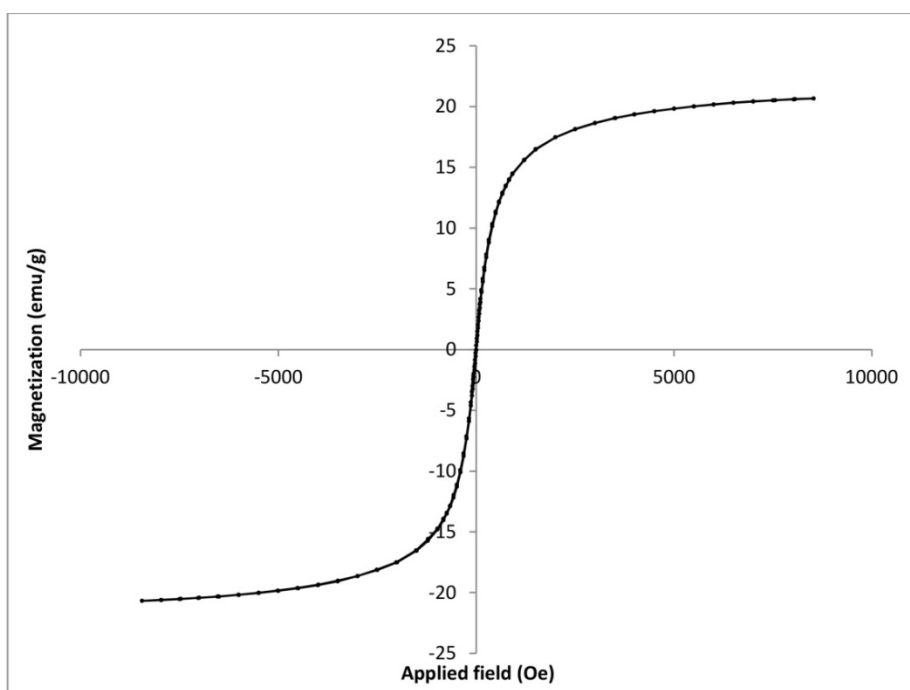

Figure S22. VSM curve for the magnetic MPCS-TI/Pd (3).

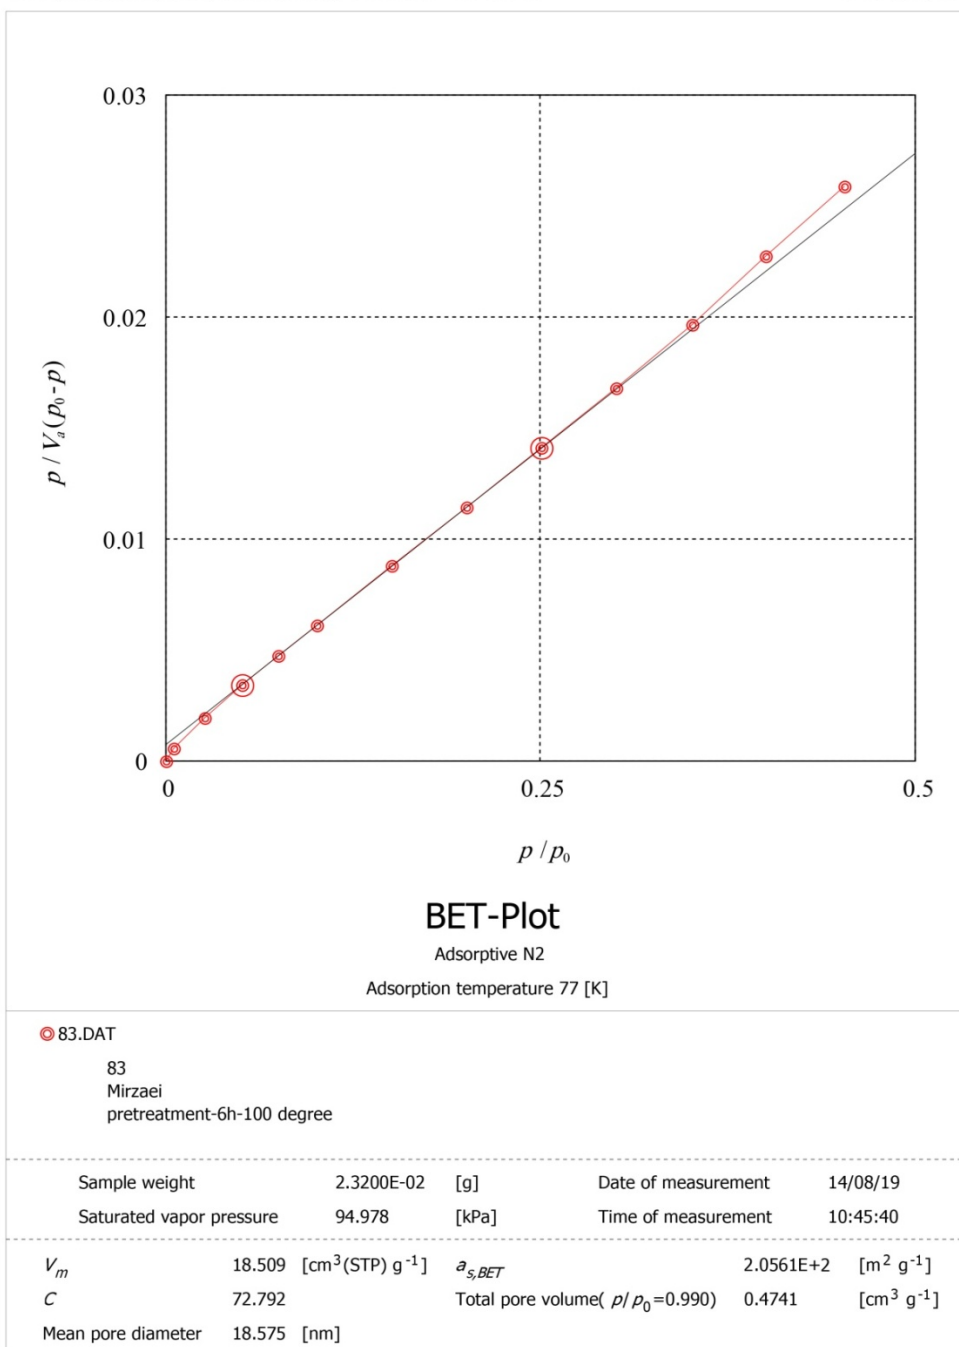

**Figure S23.** BET diagram of MPCs-TI/Pd (3).



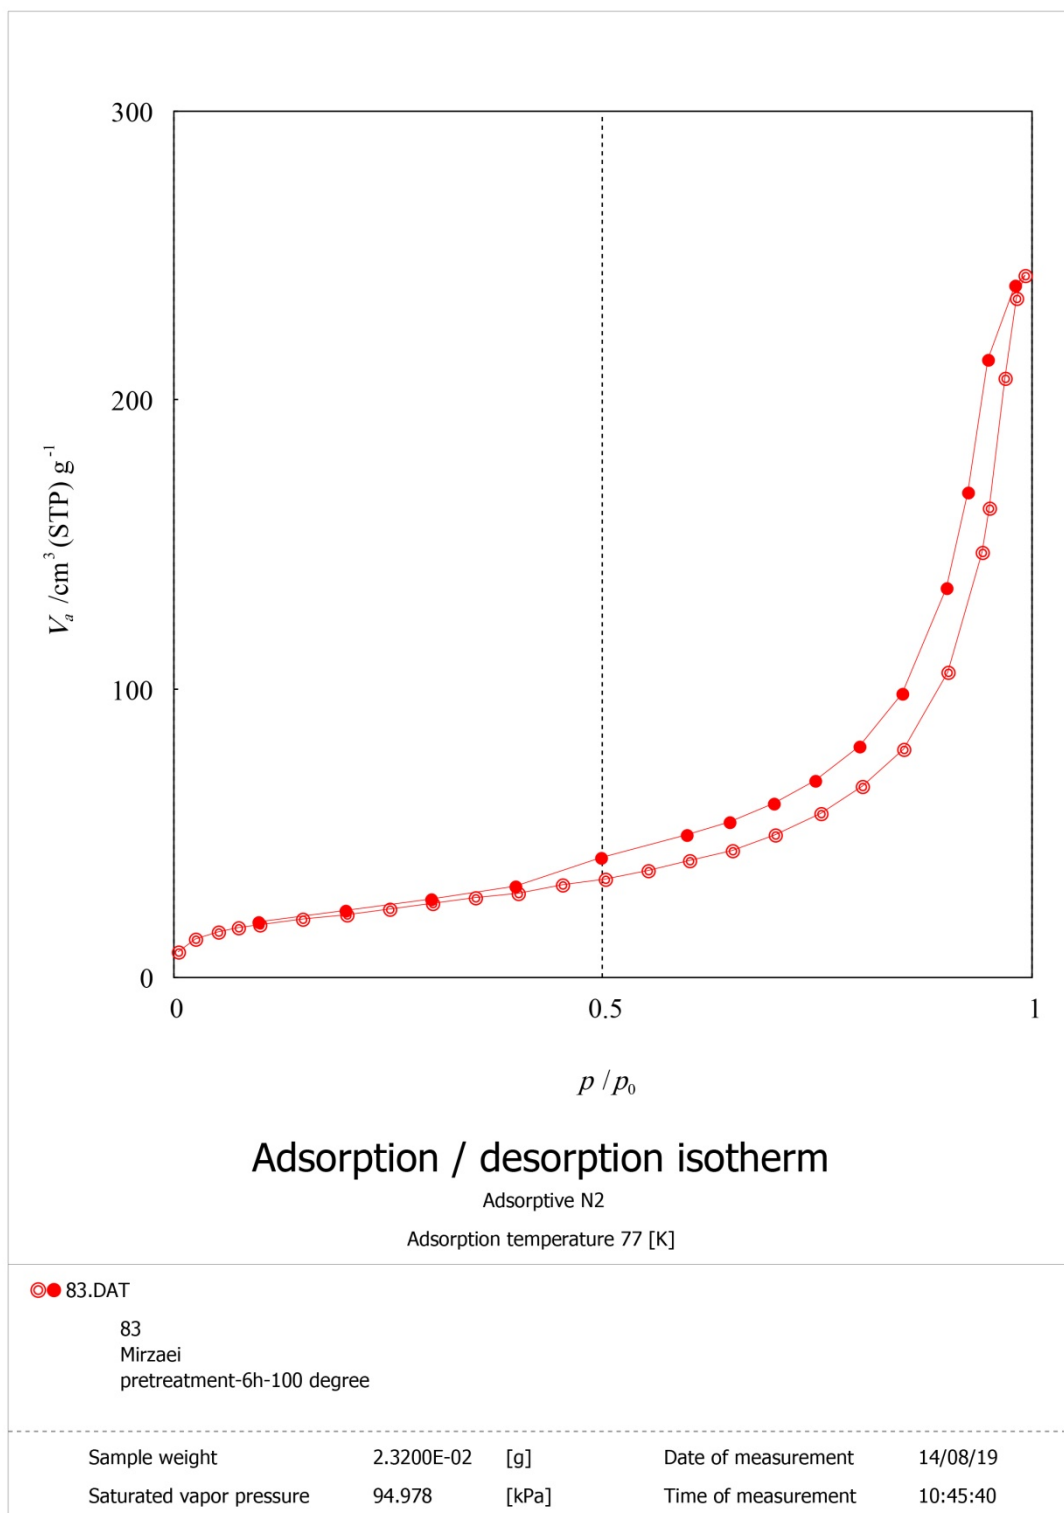

Figure S24. N<sub>2</sub> adsorption-desorption isotherm of MPCs-TI/Pd (3).

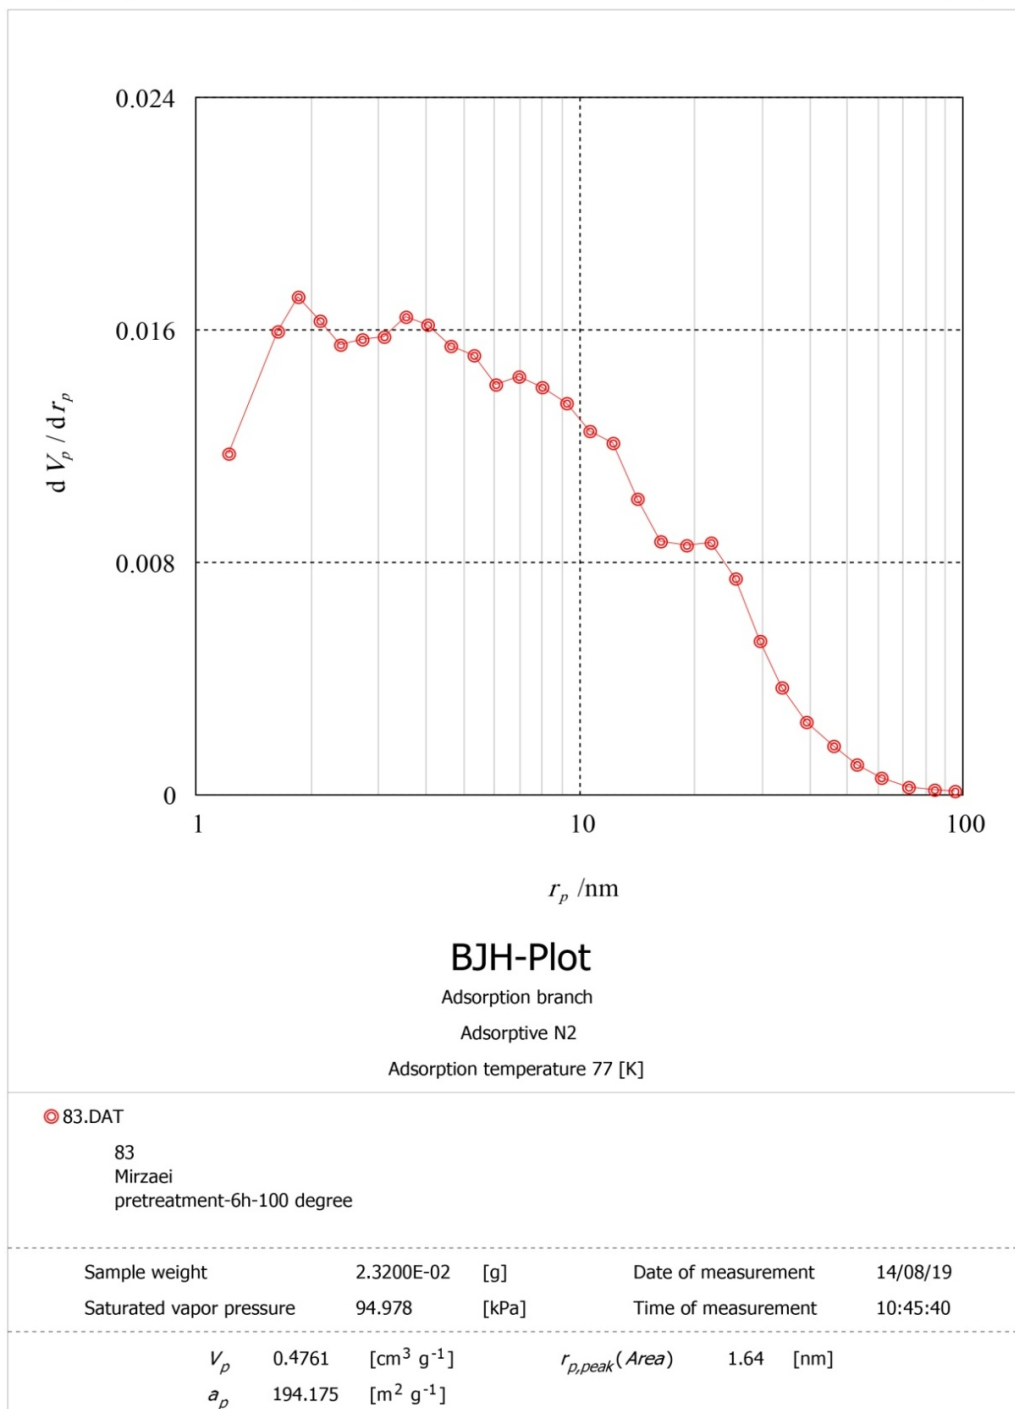

**Figure S25.** BJH diagram of MPCs-TI/Pd (3).

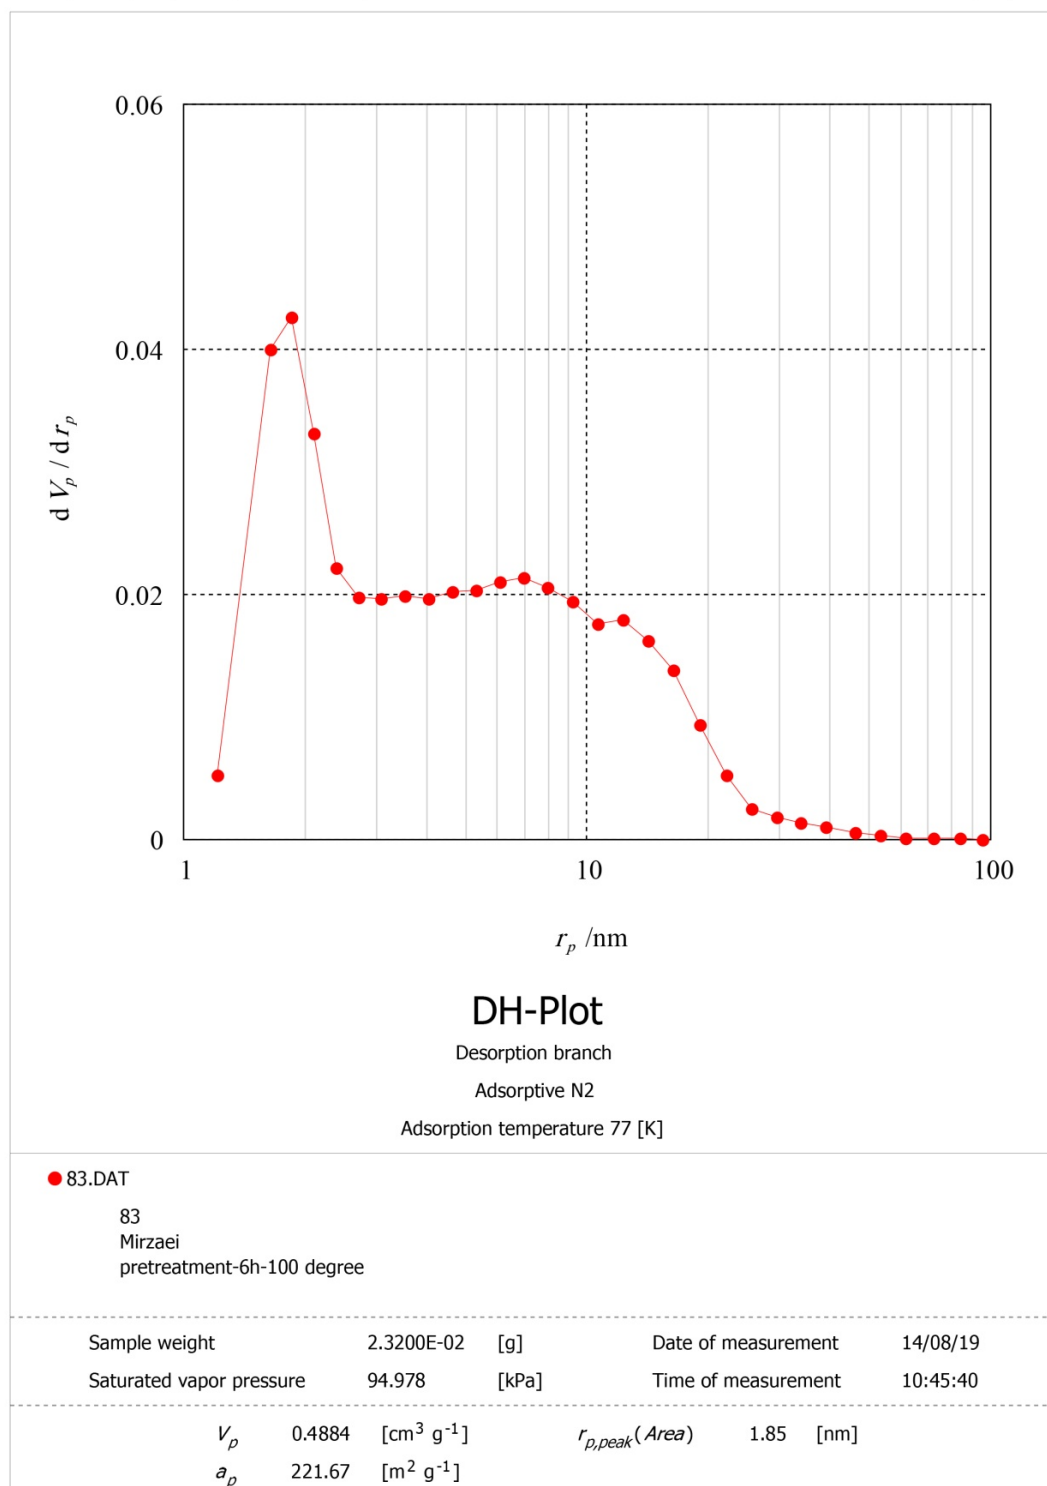

**Figure S26.** DH diagram of MPCS-TI/Pd (3).

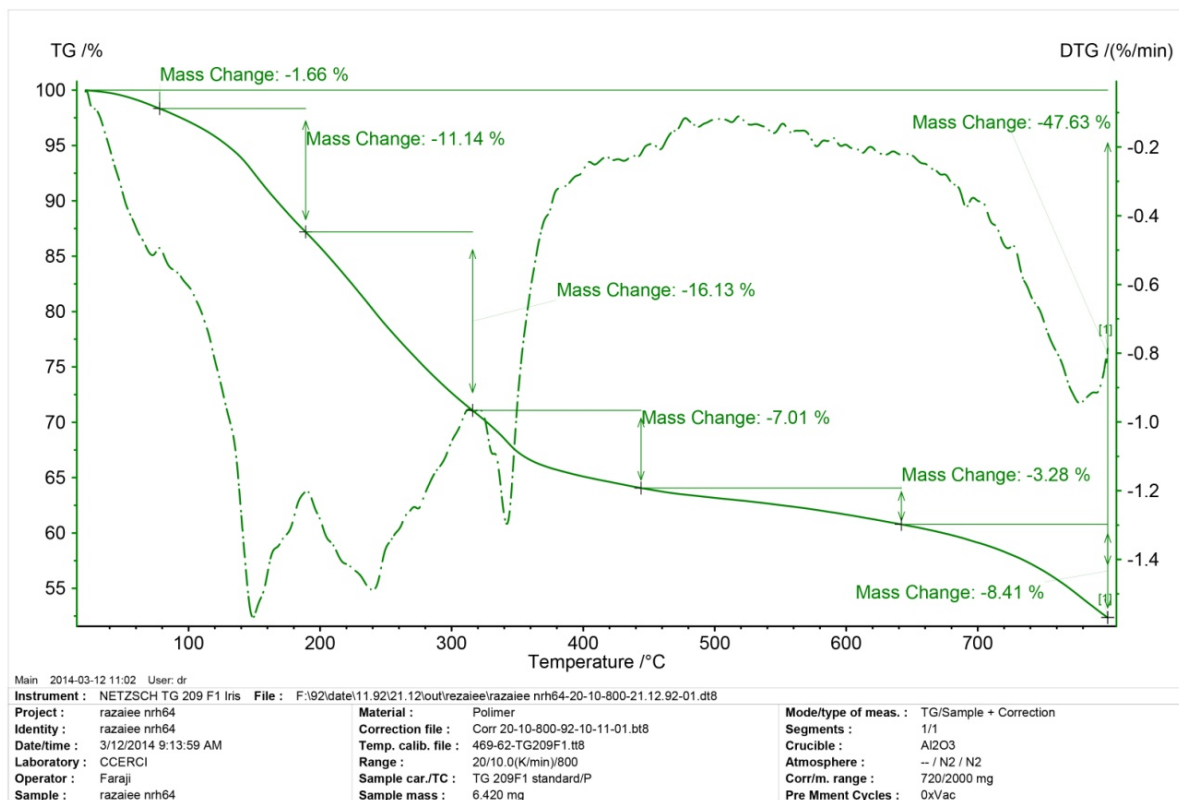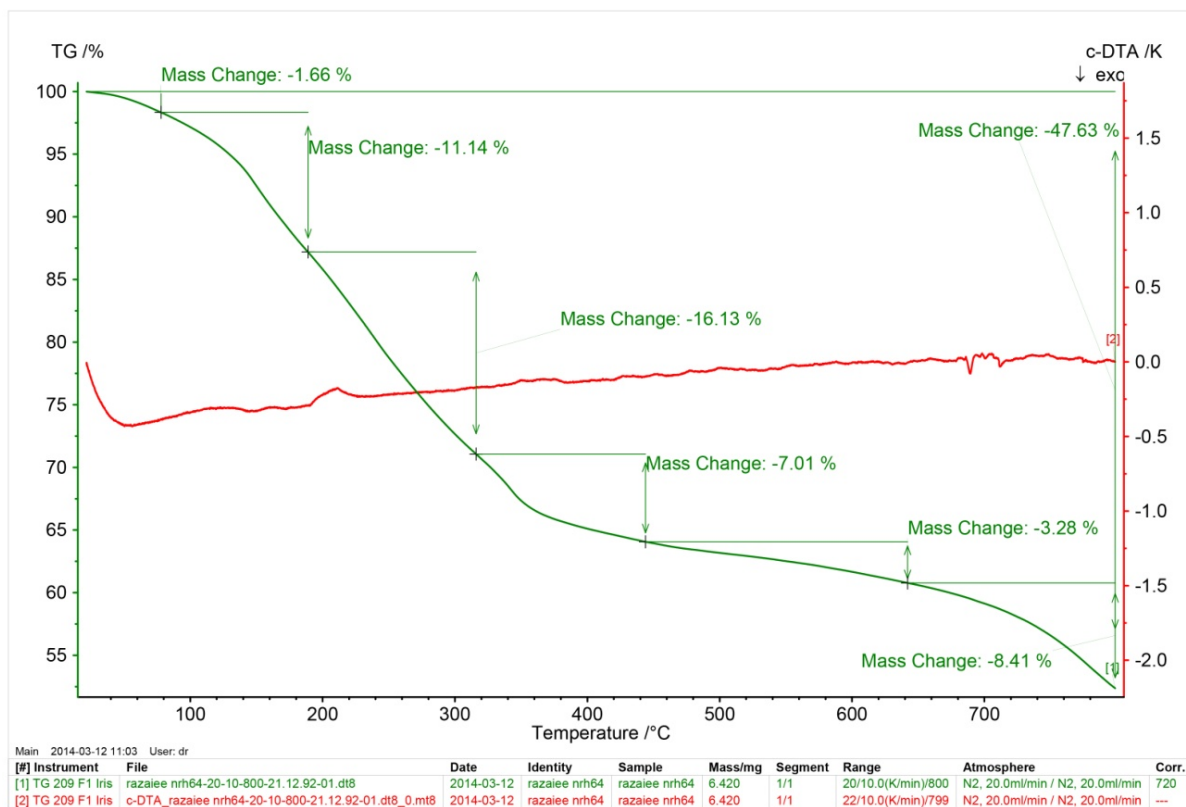

Figure S27. TG and DTA curves of MPCS-TI/Pd (3).

### 1.5. General procedure for Mizoroki-Heck coupling reaction

A mixture of aryl halide (1.0 mmol), alkene (1.3 mmol), triethylamine (2 mmol), TBAB (0.5 mmol) H<sub>2</sub>O/DMF (v/v = 2:1, 3 mL), and the catalyst (0.001 mmol, 0.1 mol% Pd) was stirred at 110 °C for an appropriate time under aerial condition. The progress of the reaction was monitored by TLC. After completion of the reaction, the mixture was cooled to room temperature, poured into H<sub>2</sub>O (10 mL), and the catalyst was separated by magnetic decantation. In the case of acrylic acid, aqueous solution of Na<sub>2</sub>CO<sub>3</sub> (10 mL, 3% w/v) was added; after separation of the catalyst, 1 N aq. HCl (5 mL) was added, and the product was extracted with ethyl acetate (3 × 10 mL). The combined organic extracts were washed with brine (2 × 10 mL), dried (MgSO<sub>4</sub>), and concentrated in vacuum. The crude product was further purified by preparative TLC (silica gel) using *n*-hexane–EtOAc (9:1) to afford the desired product.

## 2. Spectral data for Table 2

### (*E*)-4-Acetylstilbene (Table 2, 6b)<sup>1</sup>

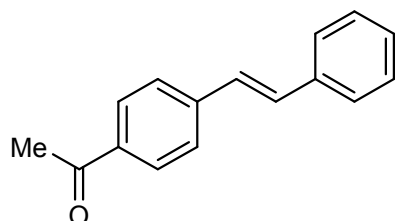

Pale-yellow solid; mp 141–143 °C; IR (KBr):  $\nu = 1678.4 \text{ cm}^{-1}$ ; <sup>1</sup>H NMR (300 MHz, CDCl<sub>3</sub>):  $\delta = 7.97$  (d,  $J = 8.3 \text{ Hz}$ , 2H), 7.60 (d,  $J = 8.4 \text{ Hz}$ , 2H), 7.55 (d,  $J = 7.5 \text{ Hz}$ , 2H), 7.39 (t,  $J = 7.1 \text{ Hz}$ , 2H), 7.31–7.33 (m, 1H), 7.24 (d,  $J = 14.3 \text{ Hz}$ , 1H), 7.14 (d,  $J = 16.3 \text{ Hz}$ , 1H), 2.62 (s, 3H). <sup>13</sup>C NMR (75 MHz, CDCl<sub>3</sub>):  $\delta = 197.5, 142.0, 136.7, 135.9, 131.4, 128.9, 128.8, 128.3, 127.4, 126.8, 126.5, 26.6$ .

### (*E*)-4-Cyanostilbene (Table 2, 6c)<sup>1</sup>

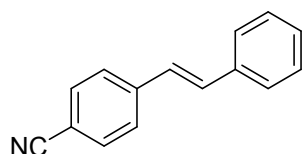

White solid; mp 116–118 °C; IR (KBr):  $\nu = 2231.9 \text{ cm}^{-1}$ ; <sup>1</sup>H NMR (300 MHz, CDCl<sub>3</sub>):  $\delta = 7.53$ – $7.66$  (m, 6H), 7.27– $7.43$  (m, 3H), 7.23 (d,  $J = 16.4 \text{ Hz}$ , 1H), 7.09 (d,  $J = 16.3 \text{ Hz}$ , 1H); <sup>13</sup>C NMR (75 MHz, CDCl<sub>3</sub>):  $\delta = 141.8, 136.3, 132.5, 132.4, 128.9, 128.7, 126.94, 126.9, 126.7, 119.1, 110.6$ .

### (*E*)-4-Formylstilbene (Table 2, 6d)<sup>2</sup>

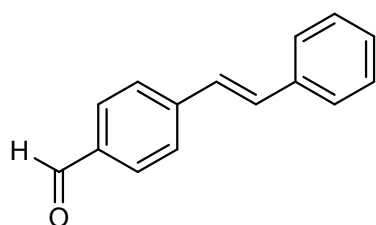

Pale-yellow solid; mp 113–116 °C; IR (KBr):  $\nu = 1700.2 \text{ cm}^{-1}$ ; <sup>1</sup>H NMR (300 MHz, CDCl<sub>3</sub>):  $\delta = 10.0$  (s, 1H), 7.88 (d,  $J = 7.8 \text{ Hz}$ , 2H), 7.66 (d,  $J = 7.8 \text{ Hz}$ , 2H), 7.56 (d,  $J = 7.2 \text{ Hz}$ , 2H), 7.31– $7.42$  (m,

3H), 7.28 (d,  $J = 16.3$  Hz, 1H), 7.15 (d,  $J = 16.3$  Hz, 1H);  $^{13}\text{C}$  NMR (75 MHz,  $\text{CDCl}_3$ ):  $\delta = 191.7$ , 143.4, 136.5, 135.3, 132.2, 130.3, 128.9, 128.5, 127.3, 126.9.

**(E)-4-Methoxystilbene (Table 2, 6f)<sup>3</sup>**

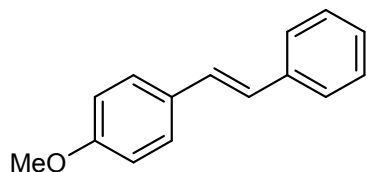

White solid; mp 134–136 °C;  $^1\text{H}$  NMR (300 MHz,  $\text{CDCl}_3$ ):  $\delta = 7.45$ -7.52 (m, 4H), 7.36 (t,  $J = 7.7$  Hz, 2H), 7.22-7.28 (m, 1H), 7.09 (d,  $J = 16.3$  Hz, 1H), 6.99 (d,  $J = 16.3$  Hz, 1H), 6.89-6.94 (m, 2H), 3.85 (s, 3H);  $^{13}\text{C}$  NMR (75 MHz,  $\text{CDCl}_3$ ):  $\delta = 159.3$ , 137.6, 130.1, 128.8, 128.2, 127.7, 127.2, 126.6, 126.3, 114.1, 55.3.

**Cinnamic acid (Table 2, 6k)<sup>4</sup>**

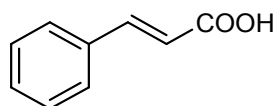

White solid; IR (KBr):  $\nu = 2963.1$ , 1697.9  $\text{cm}^{-1}$ ; m.p. 131-133 °C;  $^1\text{H}$  NMR (300 MHz,  $\text{CDCl}_3$ ):  $\delta = 11.53$  (s, 1H), 7.82 (d,  $J = 16.0$  Hz, 1H), 7.54-7.59 (m, 2H), 7.41-7.45 (m, 3H), 6.48 (d,  $J = 16.0$  Hz, 1H);  $^{13}\text{C}$  NMR (75 MHz,  $\text{CDCl}_3$ ):  $\delta = 172.5$ , 147.1, 134.0, 130.8, 128.97, 128.4, 117.3.

**(E)-4-Methoxycinnamic acid (Table 2, 6l)<sup>4</sup>**

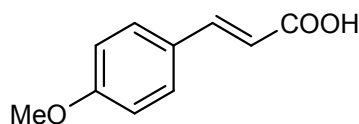

White solid; m.p. 171-174 °C; IR (KBr):  $\nu = 2938.2$ , 1686.5  $\text{cm}^{-1}$ ;  $^1\text{H}$  NMR (300 MHz,  $\text{CDCl}_3$ ):  $\delta = 11.60$  (s, 1H), 7.76 (d,  $J = 15.9$  Hz, 1H), 7.52 (d,  $J = 8.6$  Hz, 2H), 6.93 (d,  $J = 8.5$  Hz, 2H), 6.33 (d,  $J = 15.9$  Hz, 1H), 3.86 (s, 3H);  $^{13}\text{C}$  NMR (75 MHz,  $\text{CDCl}_3$ ):  $\delta = 172.3$ , 161.7, 146.7, 130.1, 126.8, 114.6, 114.4, 55.4.

**(E)-Methyl 3-*p*-tolylacrylate (Table 2, 6n)<sup>5</sup>**

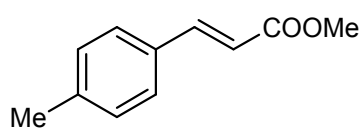

White solid; m.p. 56-58 °C; IR (KBr):  $\nu = 1711.5 \text{ cm}^{-1}$ ;  $^1\text{H NMR}$  (300 MHz,  $\text{CDCl}_3$ ):  $\delta = 7.68$  (d,  $J = 16.0$  Hz, 1H), 7.42 (d,  $J = 8.0$  Hz, 2H), 7.18 (d,  $J = 7.9$  Hz, 2H), 6.41 (d,  $J = 16.0$  Hz, 1H), 3.80 (s, 3H), 2.37 (s, 3H);  $^{13}\text{C NMR}$  (75 MHz,  $\text{CDCl}_3$ ):  $\delta = 167.6, 144.8, 140.7, 131.7, 129.6, 128.1, 116.7, 51.6, 21.4$ .

**(E)-Methyl 2-methyl-3-phenylacrylate (Table 2, 6p)<sup>6</sup>**

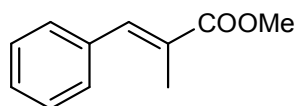

Light yellow oil; IR (KBr):  $\nu = 1714.4 \text{ cm}^{-1}$ ;  $^1\text{H NMR}$  (300 MHz,  $\text{CDCl}_3$ ):  $\delta = 7.71$  (s, 1H), 7.41 (d,  $J = 4.2$  Hz, 2H), 7.28-7.37 (m, 3H), 3.84 (s, 3H), 2.14 (s, 3H);  $^{13}\text{C NMR}$  (75 MHz,  $\text{CDCl}_3$ ):  $\delta = 169.2, 135.9, 130.7, 129.6, 129.2, 128.5, 128.4, 52.1, 14.1$ .

**(E)-Ethyl 3-(naphthalen-5-yl)acrylate (Table 2, 6q)<sup>6</sup>**

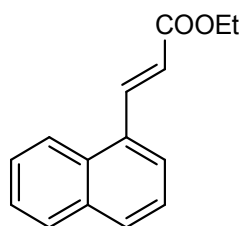

Light yellow oil; IR (KBr):  $\nu = 1711.4 \text{ cm}^{-1}$ ;  $^1\text{H NMR}$  (300 MHz,  $\text{CDCl}_3$ ):  $\delta = 8.56$  (d,  $J = 15.8$  Hz, 1H), 8.21 (d,  $J = 8.2$  Hz, 1H), 7.86-7.90 (m, 2H); 7.75 (d,  $J = 7.2$  Hz, 1H), 7.45-7.61 (m, 3H), 6.55 (d,  $J = 15.8$  Hz, 1H), 4.33 (q,  $J = 7.1$  Hz, 2H), 1.40 (t,  $J = 7.1$  Hz, 3H);  $^{13}\text{C NMR}$  (75 MHz,  $\text{CDCl}_3$ ):  $\delta = 166.9, 141.6, 133.7, 131.8, 131.4, 130.5, 128.7, 126.8, 126.2, 125.5, 124.99, 123.4, 120.9, 60.6, 14.4$ .

**(E)-Cinnamionitrile (Table 2, 6r)<sup>2</sup>**

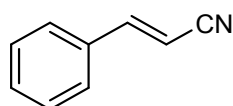

Light yellow oil; IR (neat):  $\nu = 2217.7 \text{ cm}^{-1}$ ;  $^1\text{H NMR}$  (300 MHz,  $\text{CDCl}_3$ ):  $\delta = 7.81$ -7.83 (m, 1H), 7.43-7.44 (m, 4H), 7.39 (d,  $J = 16.9$  Hz, 1H), 5.88 (d,  $J = 16.6$  Hz, 1H);  $^{13}\text{C NMR}$  (75 MHz,  $\text{CDCl}_3$ ):  $\delta = 150.6, 131.2, 129.1, 128.9, 127.4, 118.2, 96.3$ .



**(E)-Cinnamamide (Table 2, 6s)<sup>2</sup>**

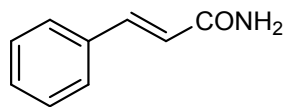

Pale-yellow solid; mp 147–149 °C; IR (KBr):  $\nu = 3575.4, 3170.9, 1662.4 \text{ cm}^{-1}$ ;  $^1\text{H NMR}$  (300 MHz,  $\text{CDCl}_3$ ):  $\delta = 7.64$  (d,  $J = 15.7 \text{ Hz}$ , 1H), 7.49 (s, 2H), 7.36 (s, 3H), 6.49 (d,  $J = 15.7 \text{ Hz}$ , 1H), 6.15 (brs, 1H), 5.97 (brs, 1H);  $^{13}\text{C NMR}$  (75 MHz,  $\text{CDCl}_3$ ):  $\delta = 168.0, 142.4, 134.5, 129.9, 128.8, 127.9, 119.6$ .

### 3. Copy of <sup>1</sup>H- and <sup>13</sup>C-NMR spectra of products Mizoroki-Heck reaction

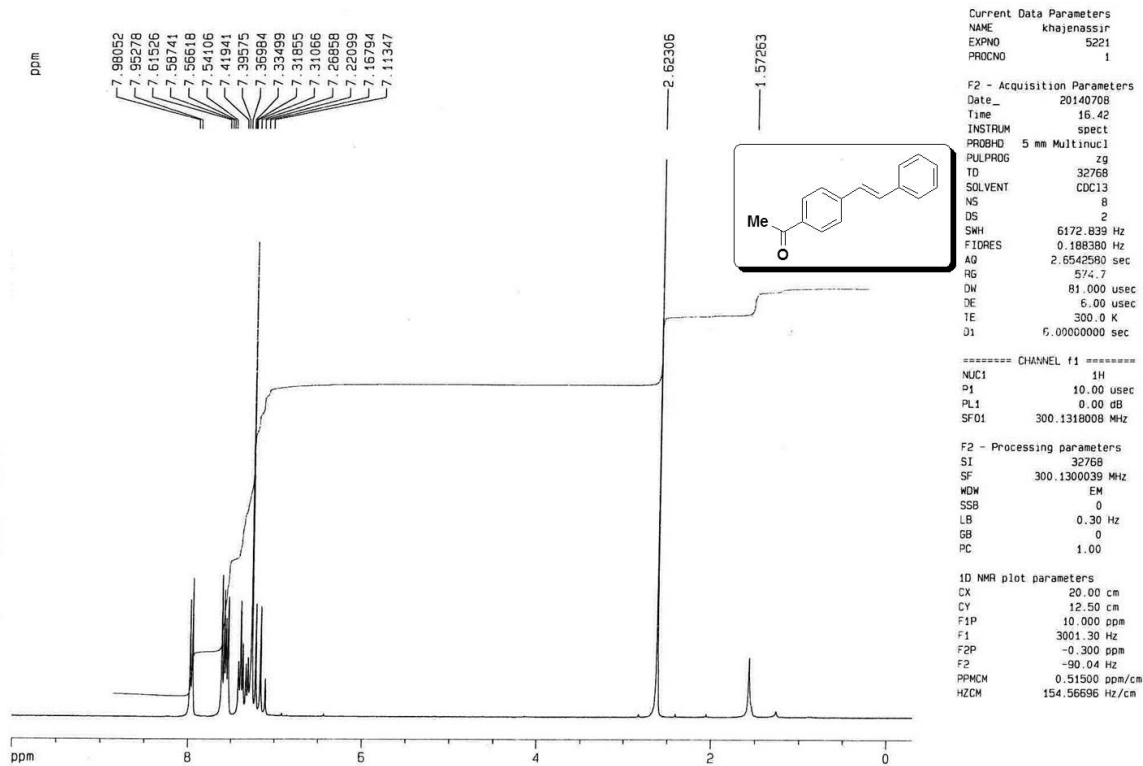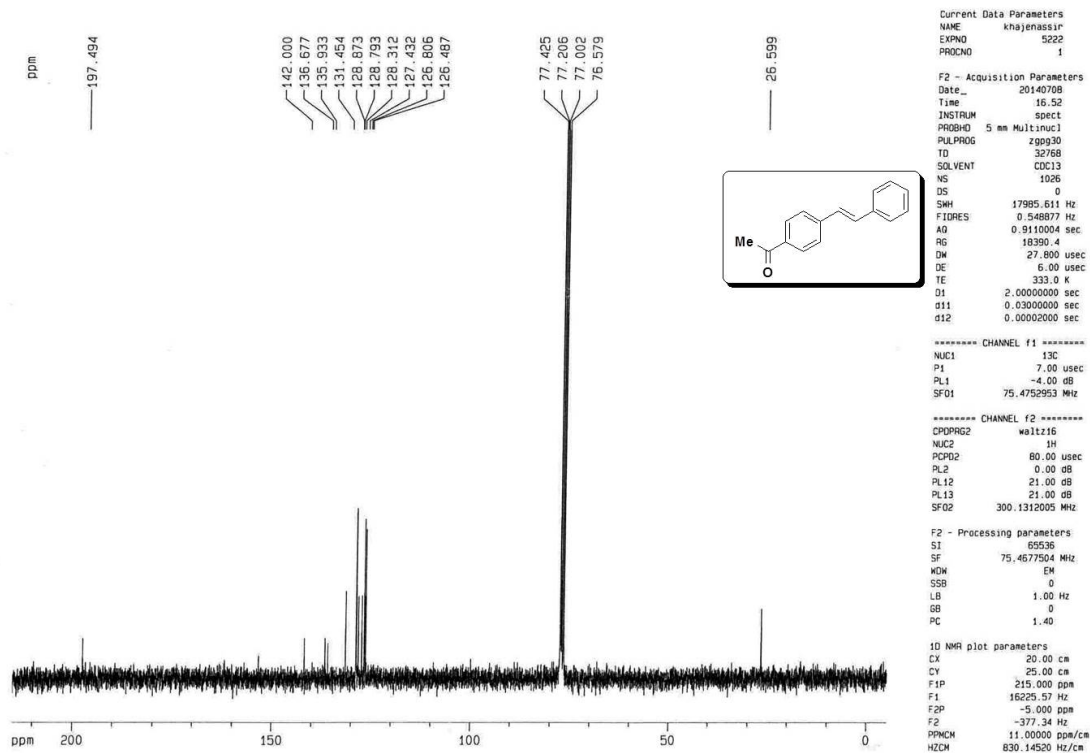

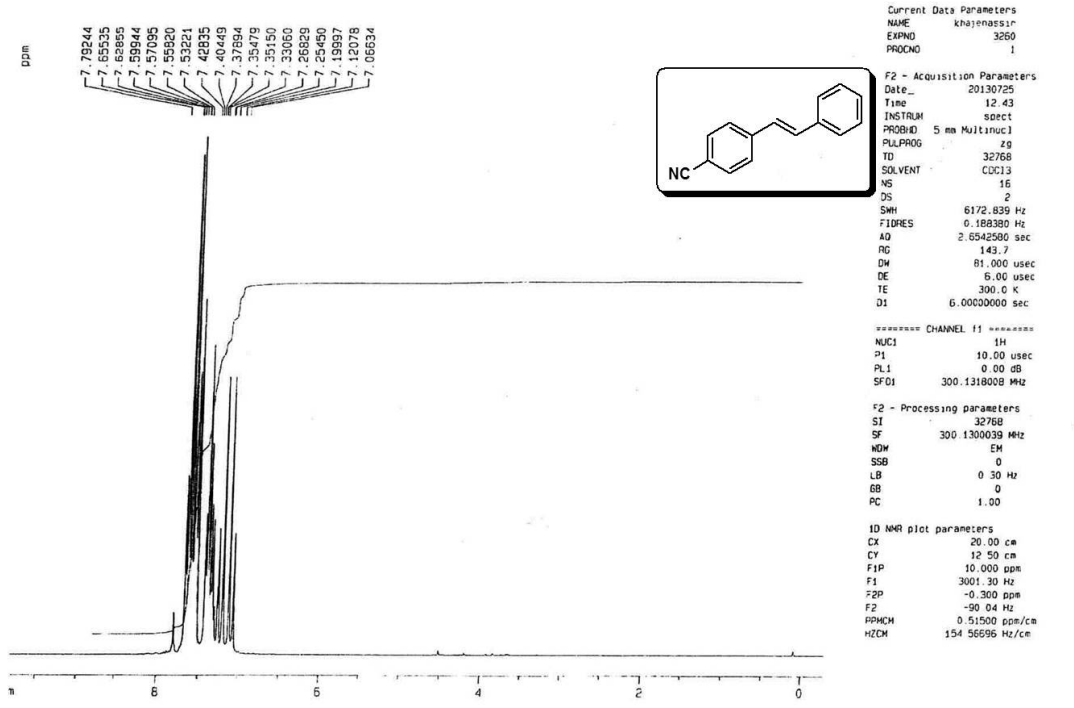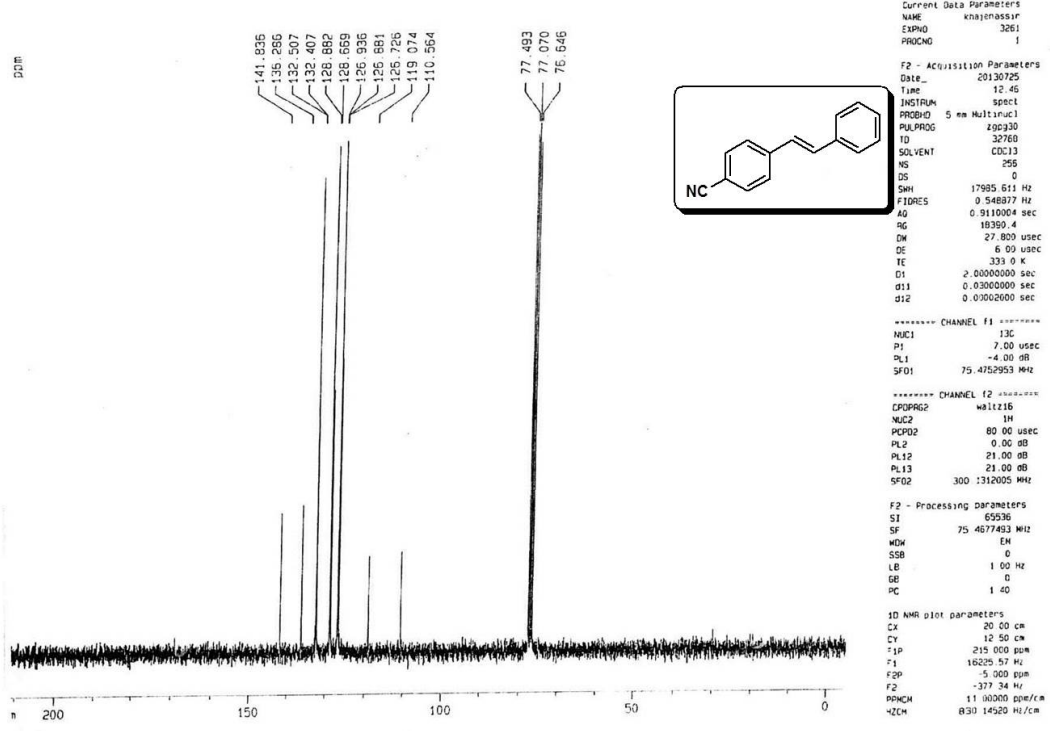

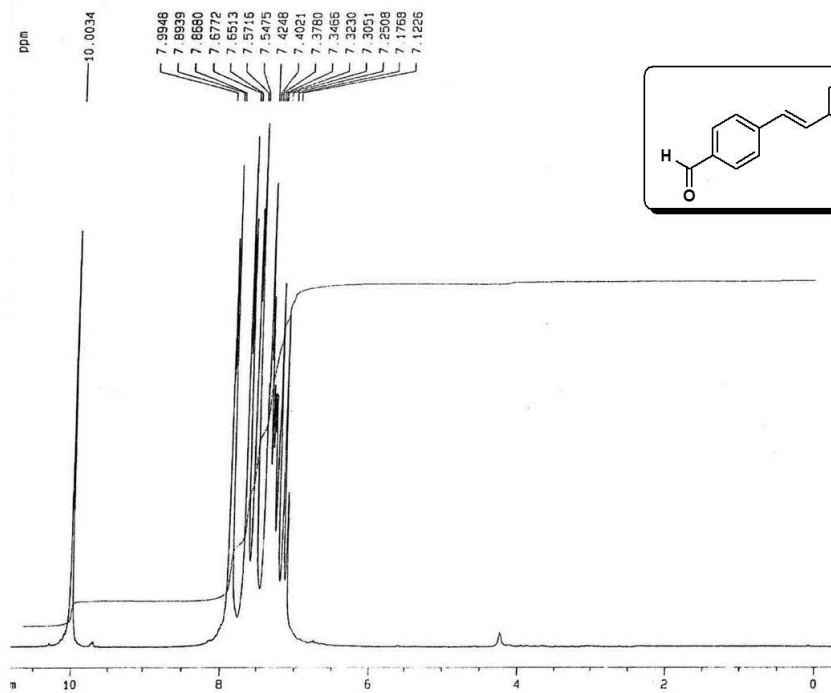

Current Data Parameters  
 NAME khajenassin  
 EXPNO 3262  
 PROCNO 1

F2 - Acquisition Parameters  
 Date\_ 20130725  
 Time 13.03  
 INSTRUM spect  
 PROBHD 5 mm Multinuc1  
 PULPROG zg  
 TD 32768  
 SOLVENT CDCl3  
 NS 16  
 DS 2  
 SWH 6172.835 Hz  
 FIDRES 0.188380 Hz  
 AQ 2.6542580 sec  
 RG 181  
 DM 81.000 usec  
 DE 6.00 usec  
 TE 300.0 K  
 D1 6.00000000 sec

\*\*\*\*\* CHANNEL f1 \*\*\*\*\*  
 NUC1 1H  
 P1 10.00 usec  
 PL1 0.00 dB  
 SFO1 300.1316008 MHz

F2 - Processing parameters  
 SI 32768  
 SF 300.1300039 MHz  
 MDW EH  
 SSB 0  
 LB 0.30 Hz  
 GB 0  
 PC 1.00

1D NMR plot parameters  
 CX 20.00 cm  
 CY 12.50 cm  
 F1P 1.000 ppm  
 F1 3301.43 Hz  
 F2P -0.300 ppm  
 F2 -90.04 Hz  
 PRMCH 0.56500 ppm/cm  
 HZCM 169.57344 Hz/cm

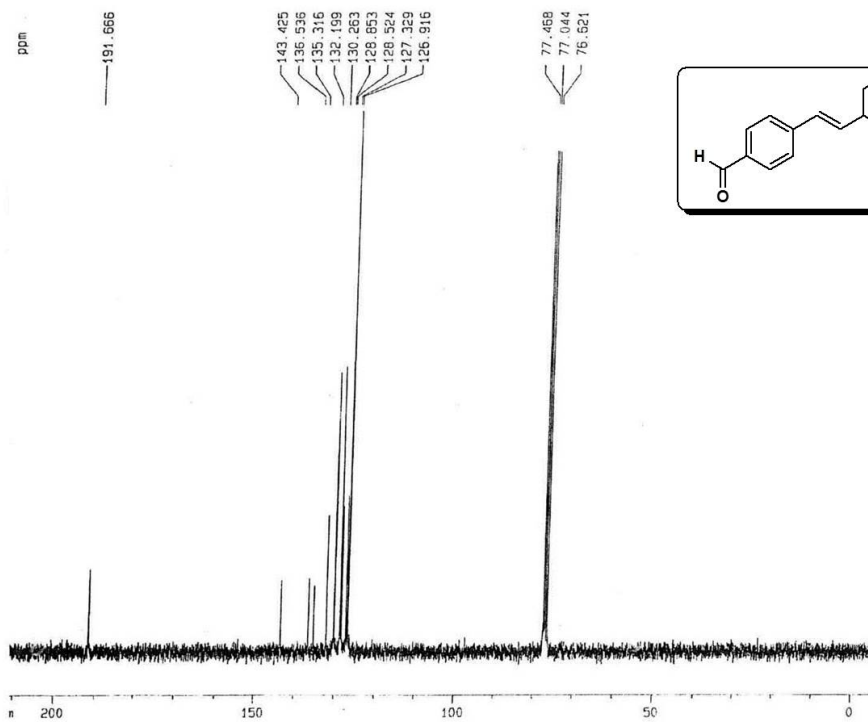

Current Data Parameters  
 NAME khajenassin  
 EXPNO 3263  
 PROCNO 1

F2 - Acquisition Parameters  
 Date\_ 20130725  
 Time 13.19  
 INSTRUM spect  
 PROBHD 5 mm Multinuc1  
 PULPROG zgpg30  
 TD 32768  
 SOLVENT CDCl3  
 NS 600  
 DS 0  
 SWH 17985.511 Hz  
 FIDRES 0.546877 Hz  
 AQ 0.8110004 sec  
 RG 18350.4  
 DM 27.800 usec  
 DE 6.00 usec  
 TE 333.0 K  
 D1 2.00000000 sec  
 d11 0.03000000 sec  
 d12 0.00002000 sec

\*\*\*\*\* CHANNEL f1 \*\*\*\*\*  
 NUC1 13C  
 P1 7.00 usec  
 PL1 -4.00 dB  
 SFO1 75.4752953 MHz

\*\*\*\*\* CHANNEL f2 \*\*\*\*\*  
 CPDPRG2 waltz16  
 NUC2 1H  
 PCPD2 80.00 usec  
 PL2 0.00 dB  
 PL12 21.00 dB  
 PL13 21.00 dB  
 SFO2 300.1312005 MHz

F2 - Processing parameters  
 SI 65536  
 SF 75.4677463 MHz  
 MDW EH  
 SSB 0  
 LB 1.00 Hz  
 GB 0  
 PC 1.40

1D NMR plot parameters  
 CX 20.00 cm  
 CY 12.50 cm  
 F1P 215.000 ppm  
 F1 16225.57 Hz  
 F2P -5.000 ppm  
 F2 -377.34 Hz  
 PRMCH 11.00000 ppm/cm  
 HZCM 830.14520 Hz/cm

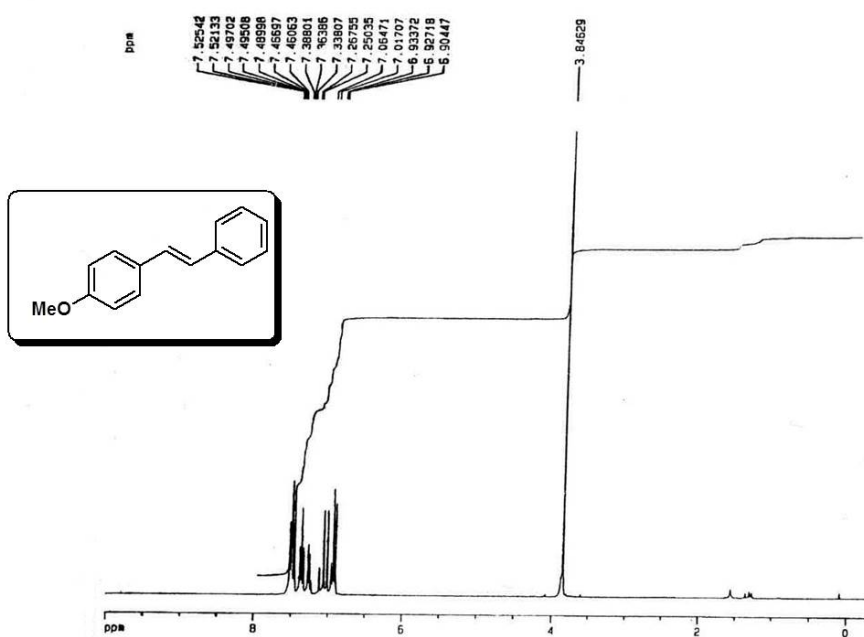

```

Current Data Parameters
NAME      khajenassir
EXPNO    3245
PROCNO   1

F2 - Acquisition Parameters
Date_    20130702
Time     20.23
INSTRUM  spect
PROBHD   5 mm Multinucl
PULPROG  zg
TD        32768
SOLVENT  CDCl3
NS        16
DS        2
SMH       6172.839 Hz
FIDRES   0.188280 Hz
AQ        2.6542800 sec
RG        228.1
DM        81.000 usec
DE        6.00 usec
TE        300.0 K
D1        6.0000000 sec

----- CHANNEL f1 -----
NUC1      1H
P1        10.00 usec
PL1       0.00 dB
SFO1     300.1318008 MHz

F2 - Processing parameters
SI        32768
SF        300.1300299 MHz
WDW       EM
SSB       0
LB        0.30 Hz
GB        0
PC        1.00

1D NMR plot parameters
CX        20.00 cm
CY        12.50 cm
F1P       10.000 ppm
F1        3001.30 Hz
F2P       -0.300 ppm
F2        -90.04 Hz
PPICH    0.51500 ppm/cm
HZCH     154.56696 Hz/cm
    
```

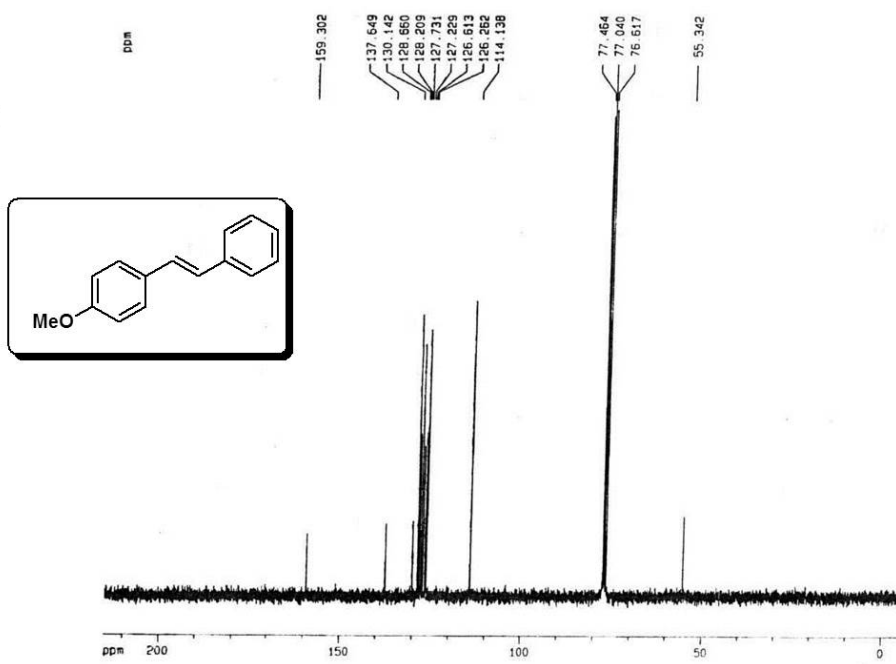

```

Current Data Parameters
NAME      khajenassir
EXPNO    3246
PROCNO   1

F2 - Acquisition Parameters
Date_    20130702
Time     20.28
INSTRUM  spect
PROBHD   5 mm Multinucl
PULPROG  zgpg30
TD        32768
SOLVENT  CDCl3
NS        540
DS        0
SMH       17985.611 Hz
FIDRES   0.548877 Hz
AQ        0.9110004 sec
RG        18390.4
DM        27.800 usec
DE        6.00 usec
TE        333.0 K
D1        2.0000000 sec
d11       0.0300000 sec
d12       0.00002000 sec

----- CHANNEL f1 -----
NUC1      13C
P1        7.00 usec
PL1       -4.00 dB
SFO1     75.4732963 MHz

----- CHANNEL f2 -----
CPDPRG2  waltz16
NUC2      1H
PCPD2    80.00 usec
PL2       0.00 dB
PL12     21.00 dB
PL13     21.00 dB
SFO2     300.1312005 MHz

F2 - Processing parameters
SI        65536
SF        75.4677493 MHz
WDW       EM
SSB       0
LB        1.00 Hz
GB        0
PC        1.40

1D NMR plot parameters
CX        20.00 cm
CY        12.50 cm
F1P       215.000 ppm
F1        18229.57 Hz
F2P       -5.000 ppm
F2        -377.34 Hz
PPICH    11.00000 ppm/cm
HZCH     838.14520 Hz/cm
    
```

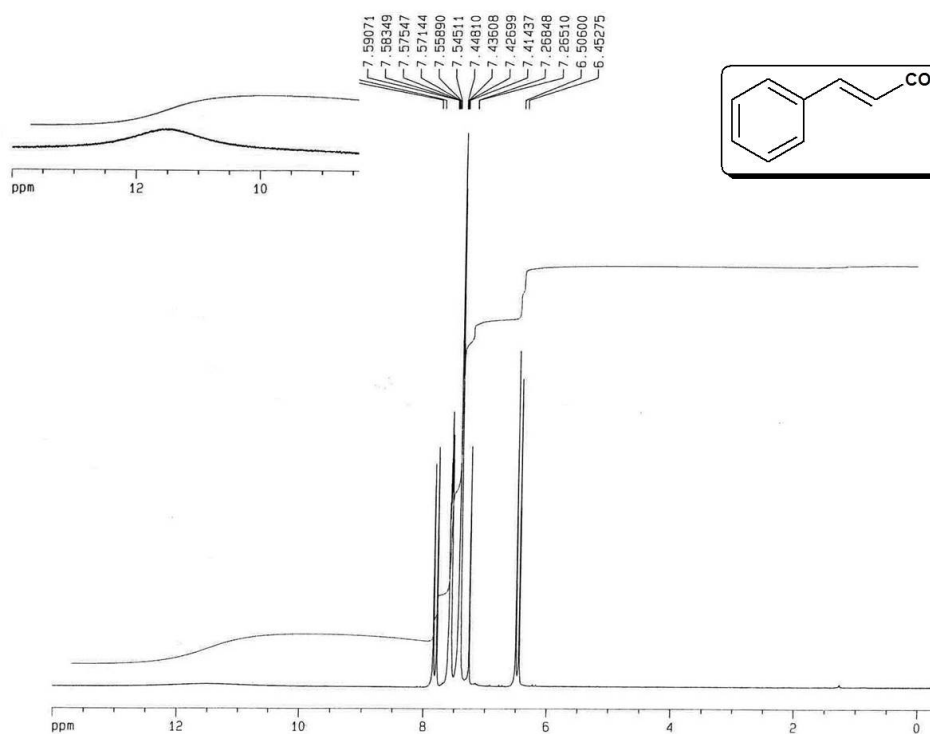

Current Data Parameters  
 NAME khajenassir  
 EXPNO 5219  
 PROCNO 1

F2 - Acquisition Parameters  
 Date\_ 20140707  
 Time 18.04  
 INSTRUM spect  
 PROBHD 5 mm Multinucl  
 PULPROG zg  
 TD 32768  
 SOLVENT CDCl3  
 NS 8  
 DS 2  
 SWH 6172.839 Hz  
 FIDRES 0.188380 Hz  
 AQ 2.6542580 sec  
 RG 228.1  
 DW 81.000 usec  
 DE 6.00 usec  
 TE 300.0 K  
 D1 6.0000000 sec

CHANNEL f1  
 NUC1 1H  
 P1 10.00 usec  
 PL1 0.00 dB  
 SFO1 300.1318008 MHz

F2 - Processing parameters  
 SI 32768  
 SF 300.1300039 MHz  
 WDW EM  
 SSB 0  
 LB 0.30 Hz  
 GB 0  
 PC 1.00

1D NMR plot parameters  
 CX 20.00 cm  
 CY 12.50 cm  
 F1P 14.000 ppm  
 F1 4201.82 Hz  
 F2P -0.300 ppm  
 F2 -90.04 Hz  
 PPMCM 0.71500 ppm/cm  
 HZCM 214.59296 Hz/cm

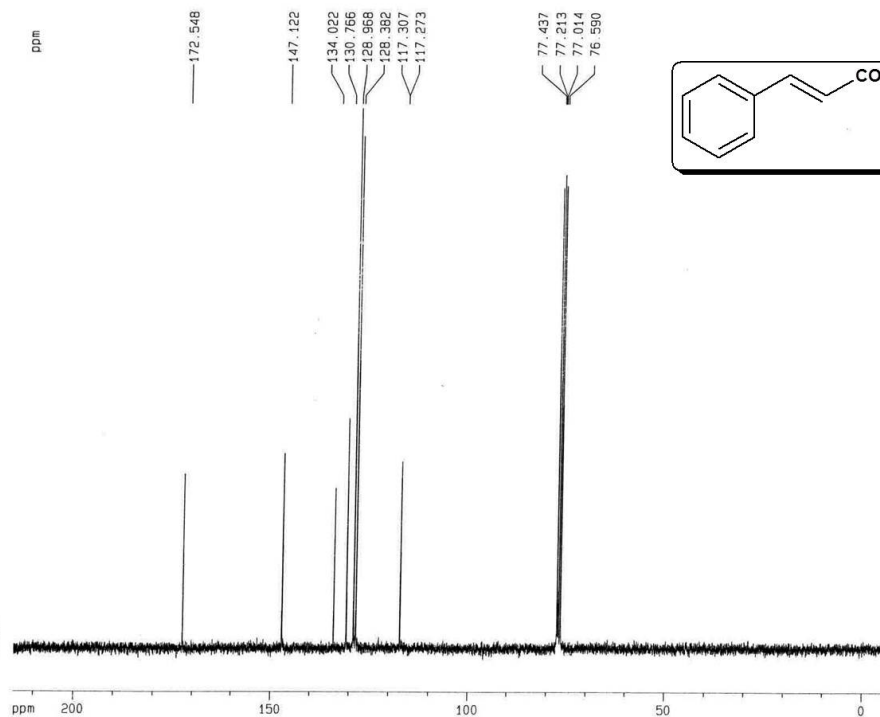

Current Data Parameters  
 NAME khajenassir  
 EXPNO 5220  
 PROCNO 1

F2 - Acquisition Parameters  
 Date\_ 20140707  
 Time 18.07  
 INSTRUM spect  
 PROBHD 5 mm Multinucl  
 PULPROG zgpg30  
 TD 32768  
 SOLVENT CDCl3  
 NS 835  
 DS 0  
 SWH 17985.611 Hz  
 FIDRES 0.548877 Hz  
 AQ 0.9110004 sec  
 RG 18390.4  
 DW 27.800 usec  
 DE 6.00 usec  
 TE 333.0 K  
 D1 2.0000000 sec  
 d11 0.0300000 sec  
 d12 0.0000200 sec

CHANNEL f1  
 NUC1 13C  
 P1 7.00 usec  
 PL1 -4.00 dB  
 SFO1 75.4752953 MHz

CHANNEL f2  
 CPDPRG2 waltz16  
 NUC2 1H  
 PCPD2 80.00 usec  
 PL2 0.00 dB  
 PL12 21.00 dB  
 PL13 21.00 dB  
 SFO2 300.1312005 MHz

F2 - Processing parameters  
 SI 65536  
 SF 75.4677504 MHz  
 WDW EM  
 SSB 0  
 LB 1.00 Hz  
 GB 0  
 PC 1.40

1D NMR plot parameters  
 CX 20.00 cm  
 CY 12.50 cm  
 F1P 215.000 ppm  
 F1 16225.57 Hz  
 F2P -5.000 ppm  
 F2 -377.34 Hz  
 PPMCM 11.00000 ppm/cm  
 HZCM 830.14520 Hz/cm

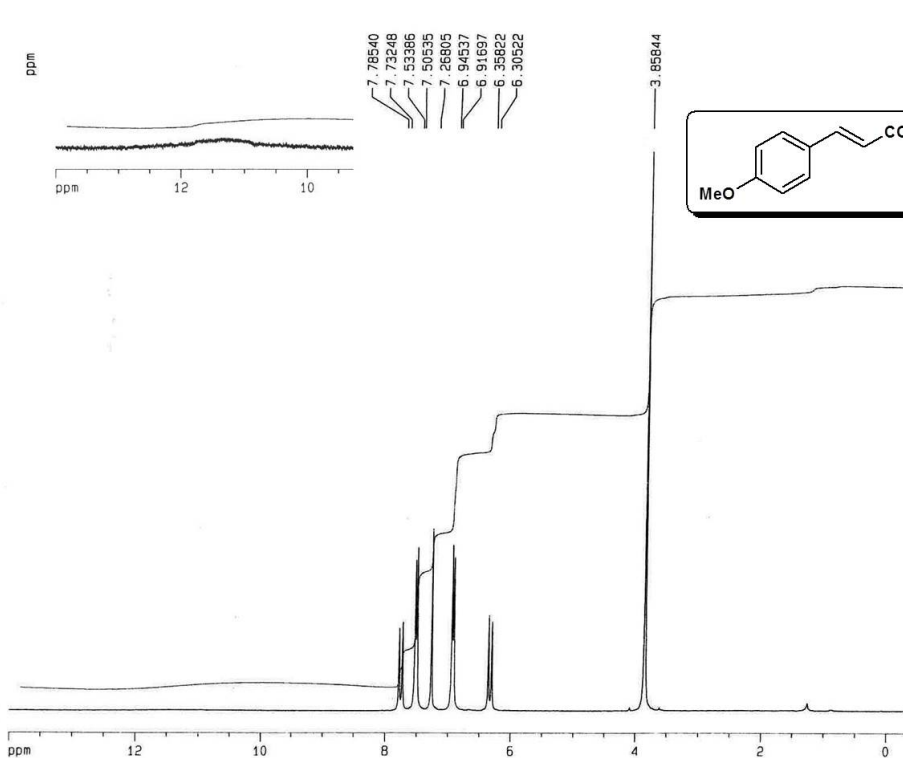

Current Data Parameters  
 NAME khajenassir  
 EXPNO 5225  
 PROCNO 1

F2 - Acquisition Parameters  
 Date\_ 20140709  
 Time 12.20  
 INSTRUM spect  
 PROBHD 5 mm Multinucl  
 PULPROG zg  
 TD 32768  
 SOLVENT CDCl3  
 NS 8  
 DS 2  
 SWH 6172.839 Hz  
 FIDRES 0.188380 Hz  
 AQ 2.6542580 sec  
 RG 406.4  
 DW 81.000 usec  
 DE 6.00 usec  
 TE 300.0 K  
 D1 6.0000000 sec

===== CHANNEL f1 =====  
 NUC1 1H  
 P1 10.00 usec  
 PL1 0.00 dB  
 SFO1 300.1318008 MHz

F2 - Processing parameters  
 SI 32768  
 SF 300.1300039 MHz  
 WDW EM  
 SSB 0  
 LB 0.30 Hz  
 GB 0  
 PC 1.00

1D NMR plot parameters  
 CX 20.00 cm  
 CY 12.50 cm  
 F1P 14.000 ppm  
 F1 4201.82 Hz  
 F2P -0.300 ppm  
 F2 -90.04 Hz  
 PPMCM 0.71500 ppm/cm  
 HZCM 214.59296 Hz/cm

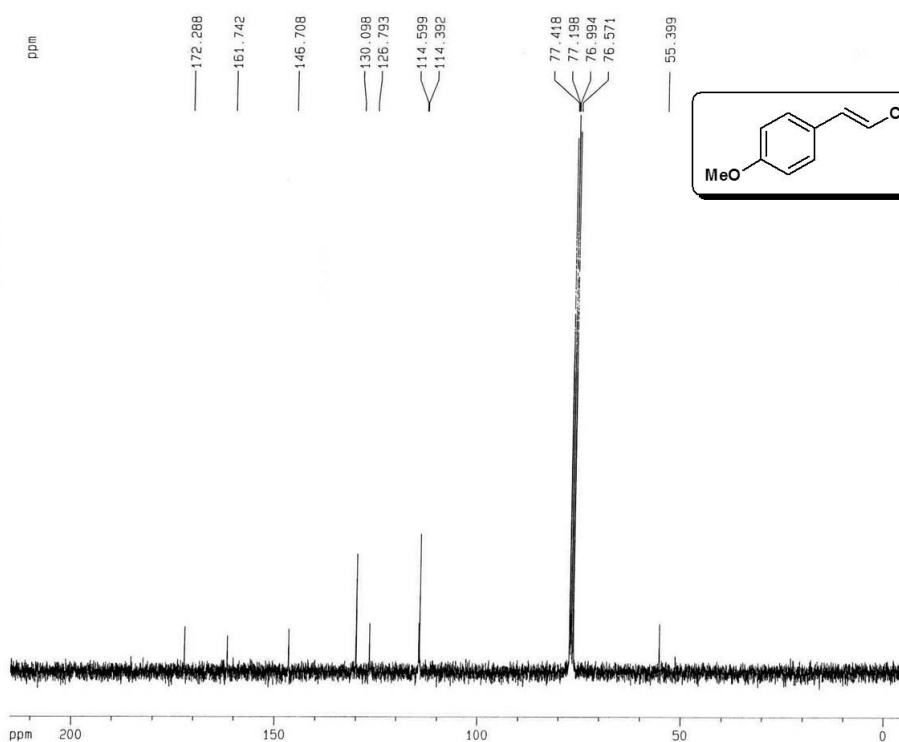

Current Data Parameters  
 NAME khajenassir  
 EXPNO 5226  
 PROCNO 1

F2 - Acquisition Parameters  
 Date\_ 20140709  
 Time 12.27  
 INSTRUM spect  
 PROBHD 5 mm Multinucl  
 PULPROG zgpg30  
 TD 32768  
 SOLVENT CDCl3  
 NS 770  
 DS 0  
 SWH 17985.611 Hz  
 FIDRES 0.548877 Hz  
 AQ 0.9110004 sec  
 RG 18390.4  
 DW 27.800 usec  
 DE 6.00 usec  
 TE 333.0 K  
 D1 2.0000000 sec  
 d11 0.0300000 sec  
 c12 0.0002000 sec

===== CHANNEL f1 =====  
 NUC1 13C  
 P1 7.00 usec  
 PL1 -4.00 dB  
 SFO1 75.4752953 MHz

===== CHANNEL f2 =====  
 CPDPRG2 waitz15  
 NUC2 1H  
 PCPD2 80.00 usec  
 PL2 0.00 dB  
 PL12 21.00 dB  
 PL13 21.00 dB  
 SFO2 300.1312005 MHz

F2 - Processing parameters  
 SI 65536  
 SF 75.4677504 MHz  
 WDW EM  
 SSB 0  
 LB 1.00 Hz  
 GB 0  
 PC 1.40

1D NMR plot parameters  
 CX 20.00 cm  
 CY 12.50 cm  
 F1P 215.000 ppm  
 F1 16225.57 Hz  
 F2P -5.000 ppm  
 F2 -377.34 Hz  
 PPMCM 11.00000 ppm/cm  
 HZCM 830.14520 Hz/cm

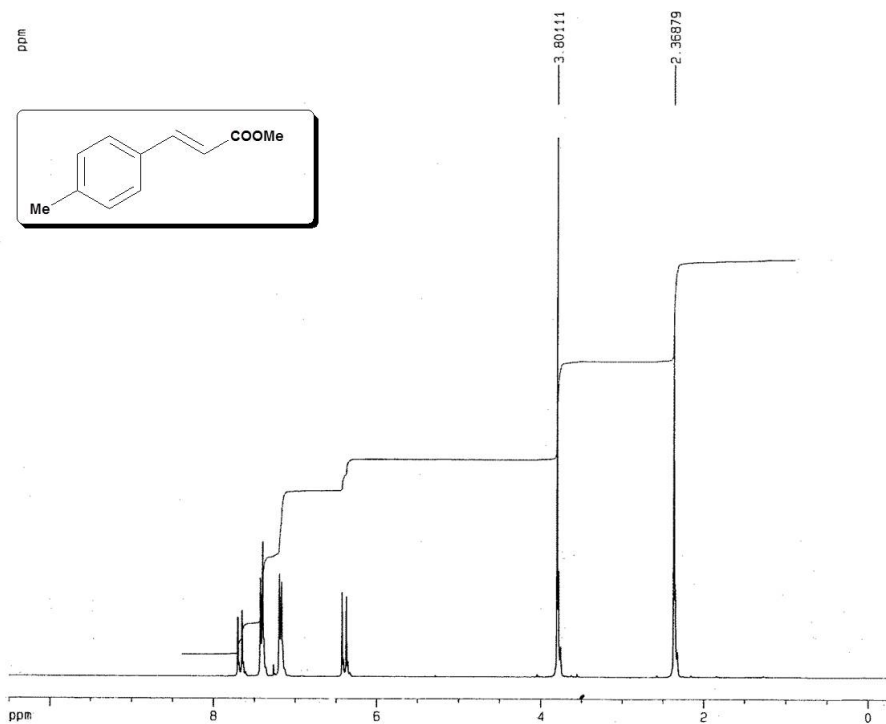

Current Data Parameters  
 NAME khajenassin  
 EXPNO 5203  
 PROCNO 1

F2 - Acquisition Parameters  
 Date\_ 20140310  
 Time 18.08  
 INSTRUM spect  
 PROBHD 5 mm Multinucl  
 PULPROG zg  
 TD 32768  
 SOLVENT CDCl3  
 NS 8  
 DS 2  
 SMH 6172.839 Hz  
 FIDRES 0.188380 Hz  
 AQ 2.6542960 sec  
 RG 40.3  
 DM 81.000 usec  
 DE 6.00 usec  
 TE 300.0 K  
 D1 6.0000000 sec

===== CHANNEL f1 =====  
 NUC1 1H  
 P1 10.00 usec  
 PL1 0.00 dB  
 SFO1 300.1318008 MHz

F2 - Processing parameters  
 SI 32768  
 SF 300.1300039 MHz  
 WDM EM  
 SSB 0  
 LB 0.30 Hz  
 GB 0  
 PC 1.00

1D NMR plot parameters  
 CX 20.00 cm  
 CY 12.50 cm  
 F1P 10.500 ppm  
 F1 3151.36 Hz  
 F2P -0.300 ppm  
 F2 -90.04 Hz  
 PPMCM 0.54000 ppm/cm  
 HZCM 162.07021 Hz/cm

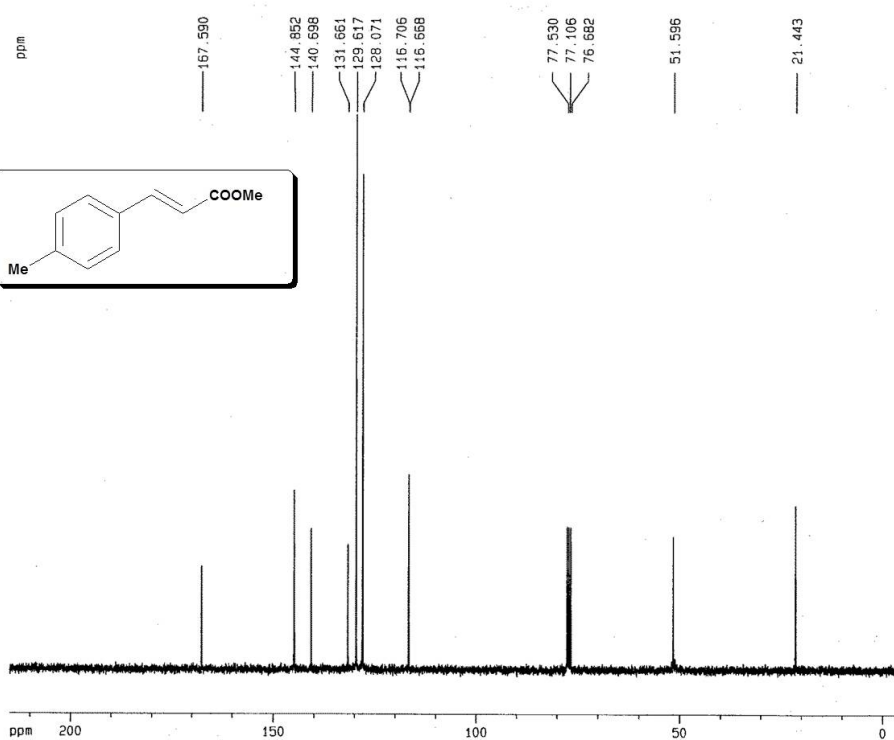

13C Data Parameters  
 khajenassin  
 5202  
 1

F2 - Acquisition Parameters  
 Date\_ 20140310  
 Time 18.07  
 INSTRUM spect  
 PROBHD 5 mm Multinucl  
 PULPROG zgpg30  
 TD 32768  
 SOLVENT CDCl3  
 NS 135  
 DS 0  
 SMH 17985.611 Hz  
 FIDRES 0.548877 Hz  
 AQ 0.9110004 sec  
 RG 3251  
 DM 27.800 usec  
 DE 6.00 usec  
 TE 333.0 K  
 D1 2.0000000 sec  
 d11 0.0300000 sec  
 d12 0.0000200 sec

===== CHANNEL f1 =====  
 NUC1 13C  
 P1 7.00 usec  
 PL1 -4.00 dB  
 SFO1 75.4752953 MHz

===== CHANNEL f2 =====  
 CPDPRG2 waltz16  
 NUC2 1H  
 PCPD2 80.00 usec  
 PL2 0.00 dB  
 PL12 21.00 dB  
 PL13 21.00 dB  
 SFO2 300.1312005 MHz

F2 - Processing parameters  
 SI 65536  
 SF 75.4677493 MHz  
 WDM EM  
 SSB 0  
 LB 1.00 Hz  
 GB 0  
 PC 1.40

1D NMR plot parameters  
 CX 20.00 cm  
 CY 12.50 cm  
 F1P 215.000 ppm  
 F1 16225.57 Hz  
 F2P -5.000 ppm  
 F2 -377.34 Hz  
 PPMCM 11.00000 ppm/cm  
 HZCM 830.14520 Hz/cm



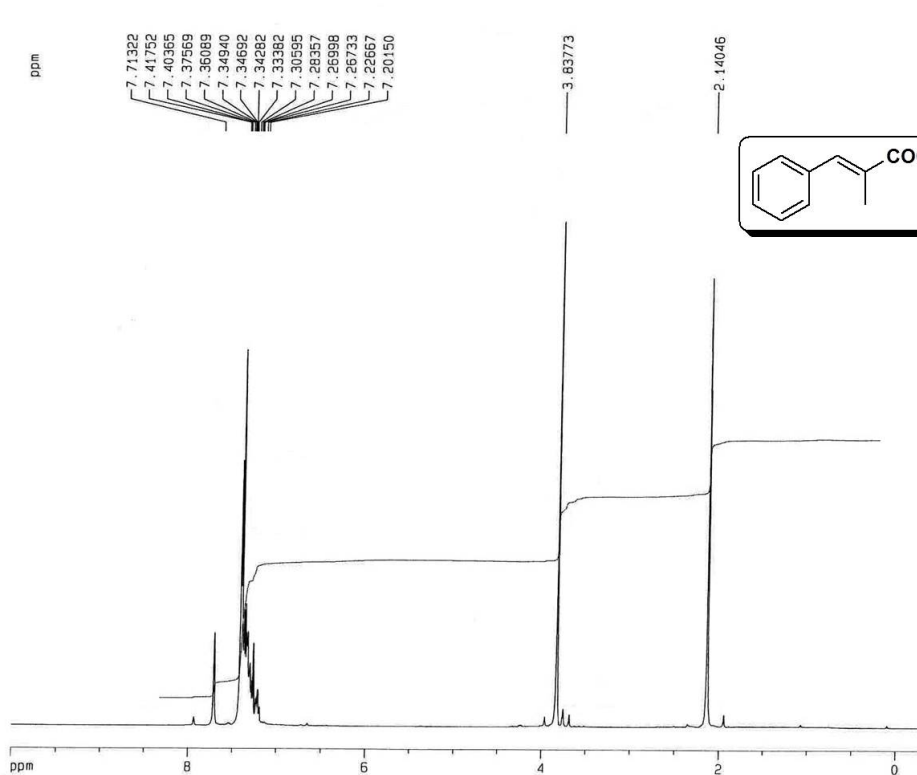

Current Data Parameters  
 NAME khajenassir  
 EXPNO 5217  
 PROCNO 1

F2 - Acquisition Parameters  
 Date\_ 20140703  
 Time 15.13  
 INSTRUM spect  
 PROBHD 5 mm Multinucl  
 PULPROG zg  
 TD 32768  
 SOLVENT CDCl3  
 NS 8  
 DS 2  
 SWH 6172.839 Hz  
 FIDRES 0.188380 Hz  
 AQ 2.6542580 sec  
 RG 90.5  
 DW 81.000 usec  
 DE 5.00 usec  
 TE 300.0 K  
 D1 6.0000000 sec

===== CHANNEL f1 =====  
 NUC1 1H  
 P1 10.00 usec  
 PL1 0.00 dB  
 SF01 300.1318008 MHz

F2 - Processing parameters  
 S1 32768  
 SF 300.130039 MHz  
 WDW EM  
 SSB 0  
 LB 0.30 Hz  
 GB 0  
 PC 1.00

1D NMR plot parameters  
 CX 20.00 cm  
 CY 12.50 cm  
 F1P 10.000 ppm  
 F1 3001.30 Hz  
 F2P -0.300 ppm  
 F2 -90.04 Hz  
 PPMCM 0.51500 ppm/cm  
 HZCM 154.56696 Hz/cm

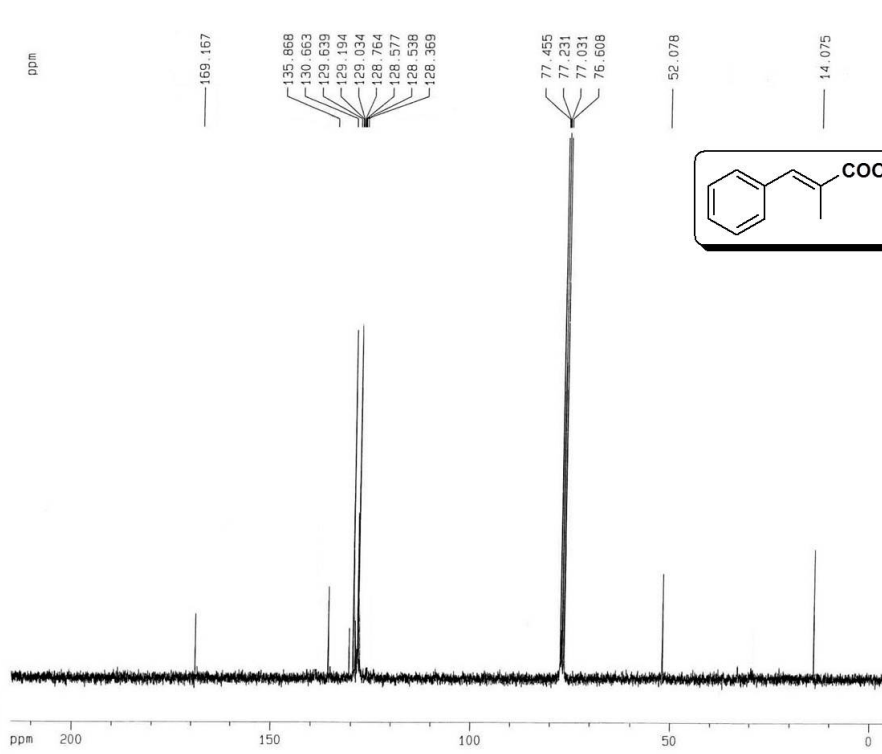

t Data Parameters  
 khajenassir  
 PROCNO 5218

F2 - Acquisition Parameters  
 Date\_ 20140703  
 Time 15.25  
 INSTRUM spect  
 PROBHD 5 mm Multinucl  
 PULPROG zgpg30  
 TD 32768  
 SOLVENT CDCl3  
 NS 705  
 DS 0  
 SWH 17985.611 Hz  
 FIDRES 0.548877 Hz  
 AQ 0.9110004 sec  
 RG 18390.4  
 DW 27.800 usec  
 DE 6.00 usec  
 TE 333.0 K  
 D1 2.0000000 sec  
 d11 0.0300000 sec  
 d12 0.0000200 sec

===== CHANNEL f1 =====  
 NUC1 13C  
 P1 7.00 usec  
 PL1 -4.00 dB  
 SF01 75.4752953 MHz

===== CHANNEL f2 =====  
 CPDPRG2 waltz16  
 NUC2 1H  
 PCPD2 80.00 usec  
 PL2 0.00 dB  
 PL12 21.00 dB  
 PL13 21.00 dB  
 SF02 300.1312005 MHz

F2 - Processing parameters  
 S1 65536  
 SF 75.4677504 MHz  
 WDW EM  
 SSB 0  
 LB 1.00 Hz  
 GB 0  
 PC 1.40

1D NMR plot parameters  
 CX 20.00 cm  
 CY 12.50 cm  
 F1P 215.000 ppm  
 F1 16225.57 Hz  
 F2P -5.000 ppm  
 F2 -377.34 Hz  
 PPMCM 11.00000 ppm/cm  
 HZCM 830.14520 Hz/cm

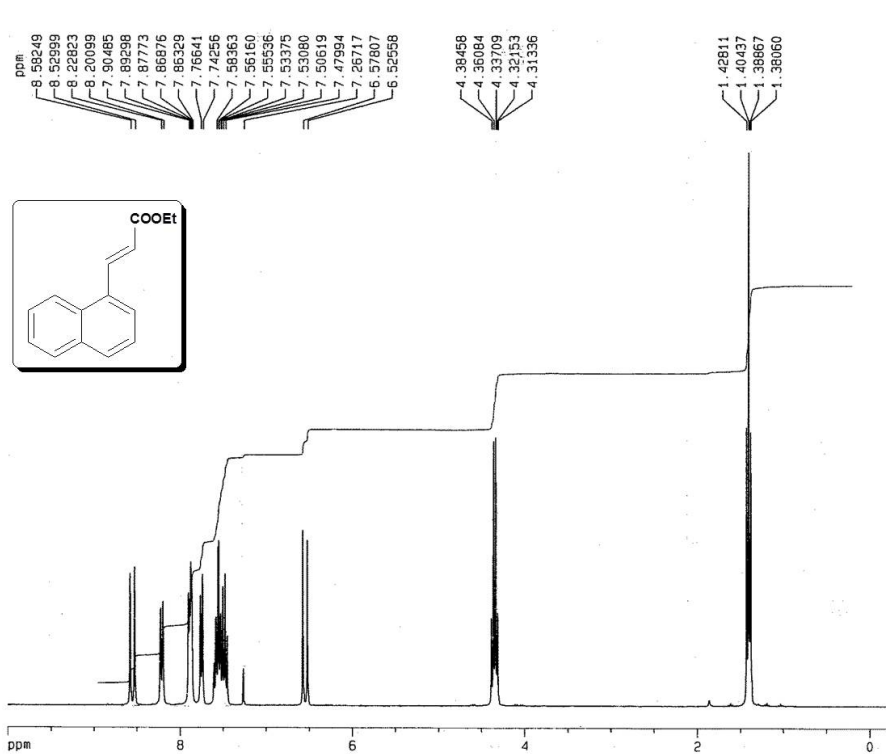

Current Data Parameters  
 NAME khajenassir  
 EXPNO 214  
 PROCNO 1

F2 - Acquisition Parameters  
 Date\_ 20140515  
 Time 12.31  
 INSTRUM spect  
 PROBHD 5 mm Multinucl  
 PULPROG zg  
 TD 32768  
 SOLVENT CDCl3  
 NS 8  
 DS 2  
 SWH 6172.839 Hz  
 FIDRES 0.188380 Hz  
 AQ 2.6542580 sec  
 RG 40.3  
 DW 81.000 usec  
 DE 6.00 usec  
 TE 300.0 K  
 D1 6.00000000 sec

\*\*\*\*\* CHANNEL f1 \*\*\*\*\*  
 NUC1 1H  
 P1 10.00 usec  
 PL1 0.00 dB  
 SFO1 300.1318008 MHz

F2 - Processing parameters  
 SI 32768  
 SF 300.1300039 MHz  
 WDW EM  
 SSB 0  
 LB 0.30 Hz  
 GB 0  
 PC 1.00

1D NMR plot parameters  
 CX 20.00 cm  
 CY 12.50 cm  
 F1P 10,000 ppm  
 F1 3001.30 Hz  
 F2P -0.300 ppm  
 F2 -90.04 Hz  
 PPMCH 0.51500 ppm/cm  
 HZCM 154.56696 Hz/cm

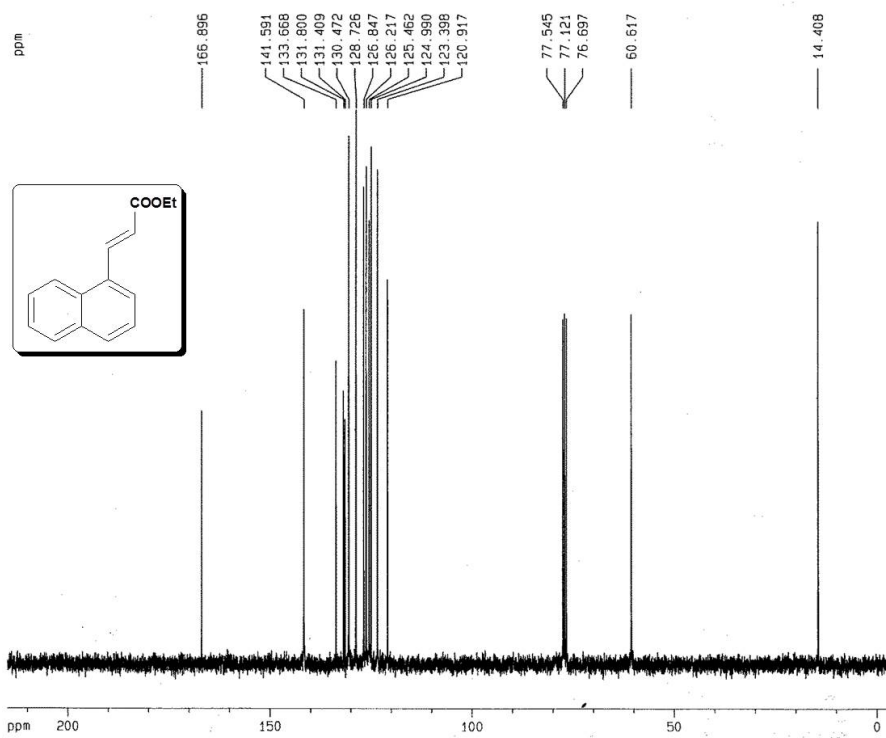

Current Data Parameters  
 NAME khajenassir  
 EXPNO 215  
 PROCNO 1

F2 - Acquisition Parameters  
 Date\_ 20140515  
 Time 12.37  
 INSTRUM spect  
 PROBHD 5 mm Multinucl  
 PULPROG zgpg30  
 TD 32768  
 SOLVENT CDCl3  
 NS 128  
 DS 0  
 SWH 17985.611 Hz  
 FIDRES 0.548877 Hz  
 AQ 0.9110004 sec  
 RG 20542.5  
 DW 27.800 usec  
 DE 6.00 usec  
 TE 333.0 K  
 D1 2.0000000 sec  
 d11 0.0300000 sec  
 d12 0.00002000 sec

\*\*\*\*\* CHANNEL f1 \*\*\*\*\*  
 NUC1 13C  
 P1 7.00 usec  
 PL1 -4.00 dB  
 SFO1 75.4752953 MHz

\*\*\*\*\* CHANNEL f2 \*\*\*\*\*  
 CPDPRG2 waltz16  
 NUC2 1H  
 PCPD2 80.00 usec  
 PL2 0.00 dB  
 PL12 21.00 dB  
 PL13 21.00 dB  
 SFO2 300.1312005 MHz

F2 - Processing parameters  
 SI 65536  
 SF 75.4677504 MHz  
 WDW EN  
 SSB 0  
 LB 1.00 Hz  
 GB 0  
 PC 1.40

1D NMR plot parameters  
 CX 20.00 cm  
 CY 12.50 cm  
 F1P 215,000 ppm  
 F1 16225.57 Hz  
 F2P -5.000 ppm  
 F2 -377.34 Hz  
 PPMCH 11.00000 ppm/cm  
 HZCM 830.14520 Hz/cm

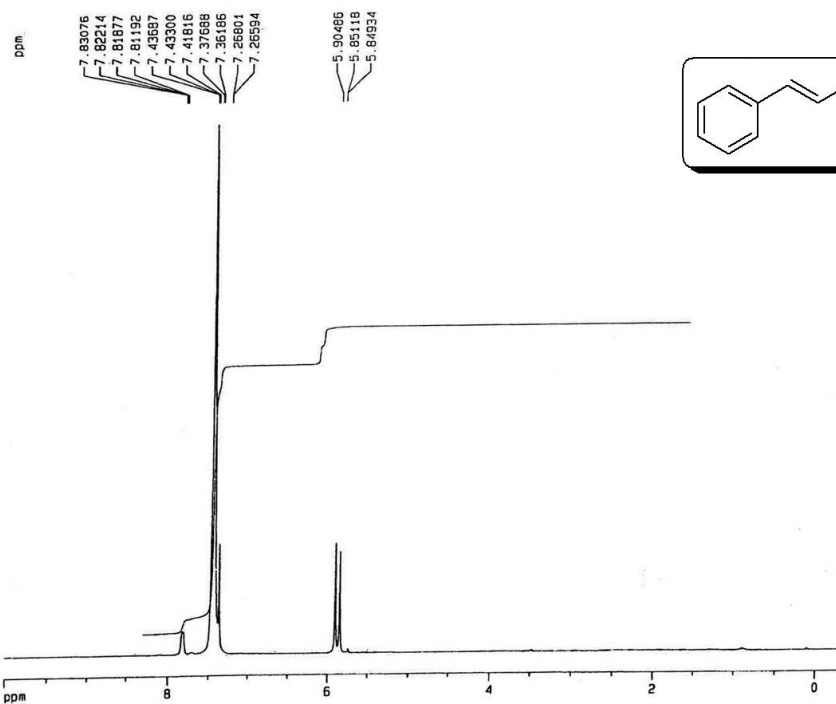

Current Data Parameters  
 NAME khajenassir  
 EXPNO 212  
 PROCNO 1

F2 - Acquisition Parameters  
 Date\_ 20140515  
 Time 12.17  
 INSTRUM spect  
 PROBHD 5 mm Multinuc1  
 PULPROG zg  
 TD 32768  
 SOLVENT CDCl3  
 NS 8  
 DS 2  
 SMH 5172.839 Hz  
 FIDRES 0.188380 Hz  
 AQ 2.654260 sec  
 RG 45.3  
 DW 81.000 usec  
 DE 6.00 usec  
 TE 300.0 K  
 D1 6.0000000 sec

\*\*\*\*\* CHANNEL f1 \*\*\*\*\*  
 NUC1 1H  
 P1 10.00 usec  
 PL1 0.00 dB  
 SFO1 300.1318008 MHz

F2 - Processing parameters  
 SI 32768  
 SF 300.1300039 MHz  
 WDM EM  
 SSB 0  
 LB 0.30 Hz  
 GB 0  
 PC 1.00

1D NMR plot parameters  
 CX 20.00 cm  
 CY 12.50 cm  
 F1P 10.000 ppm  
 F1 3001.30 Hz  
 F2P -0.300 ppm  
 F2 -90.04 Hz  
 PPMCM 0.51500 ppm/cm  
 HZCM 154.56696 Hz/cm

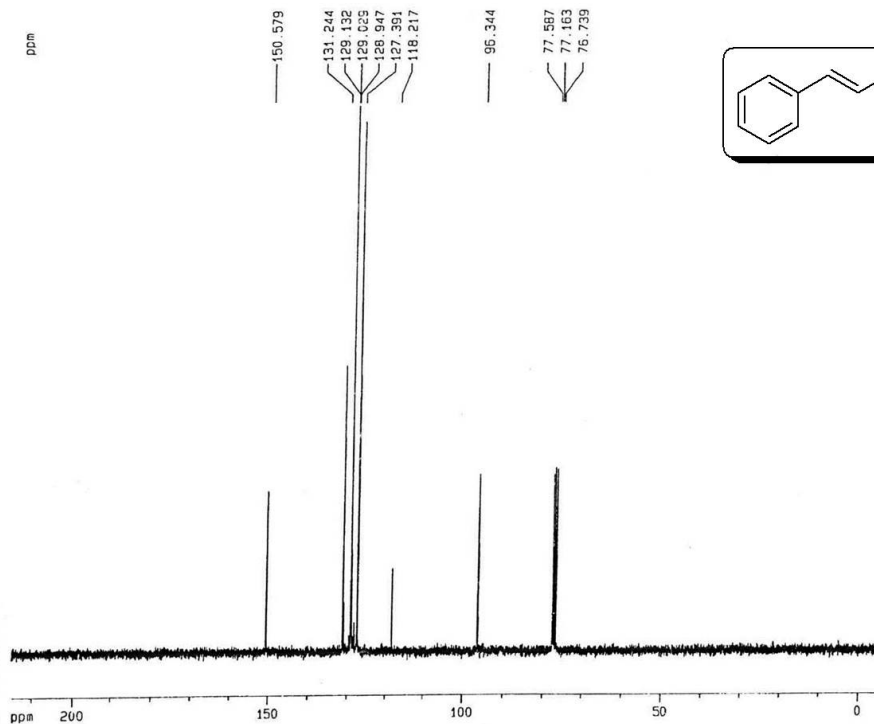

Current Data Parameters  
 NAME khajenassir  
 EXPNO 213  
 PROCNO 1

F2 - Acquisition Parameters  
 Date\_ 20140515  
 Time 12.19  
 INSTRUM spect  
 PROBHD 5 mm Multinuc1  
 PULPROG zgpg30  
 TD 32768  
 SOLVENT CDCl3  
 NS 128  
 DS 0  
 SMH 17995.611 Hz  
 FIDRES 0.548877 Hz  
 AQ 0.9110004 sec  
 RG 20642.5  
 DW 27.800 usec  
 DE 8.00 usec  
 TE 333.0 K  
 D1 2.0000000 sec  
 d11 0.0300000 sec  
 d12 0.0000200 sec

\*\*\*\*\* CHANNEL f1 \*\*\*\*\*  
 NUC1 13C  
 P1 7.00 usec  
 PL1 -4.00 dB  
 SFO1 75.4752953 MHz

\*\*\*\*\* CHANNEL f2 \*\*\*\*\*  
 CHPRG2 waltz16  
 NUC2 1H  
 PCPD2 80.00 usec  
 PL2 0.00 dB  
 PL12 21.00 dB  
 PL13 21.00 dB  
 SFO2 300.1312005 MHz

F2 - Processing parameters  
 SI 65536  
 SF 75.4577504 MHz  
 WDM EM  
 SSB 0  
 LB 1.00 Hz  
 GB 0  
 PC 1.40

1D NMR plot parameters  
 CX 20.00 cm  
 CY 12.50 cm  
 F1P 215.000 ppm  
 F1 16225.57 Hz  
 F2P -5.000 ppm  
 F2 -377.34 Hz  
 PPMCM 11.00000 ppm/cm  
 HZCM 830.14520 Hz/cm

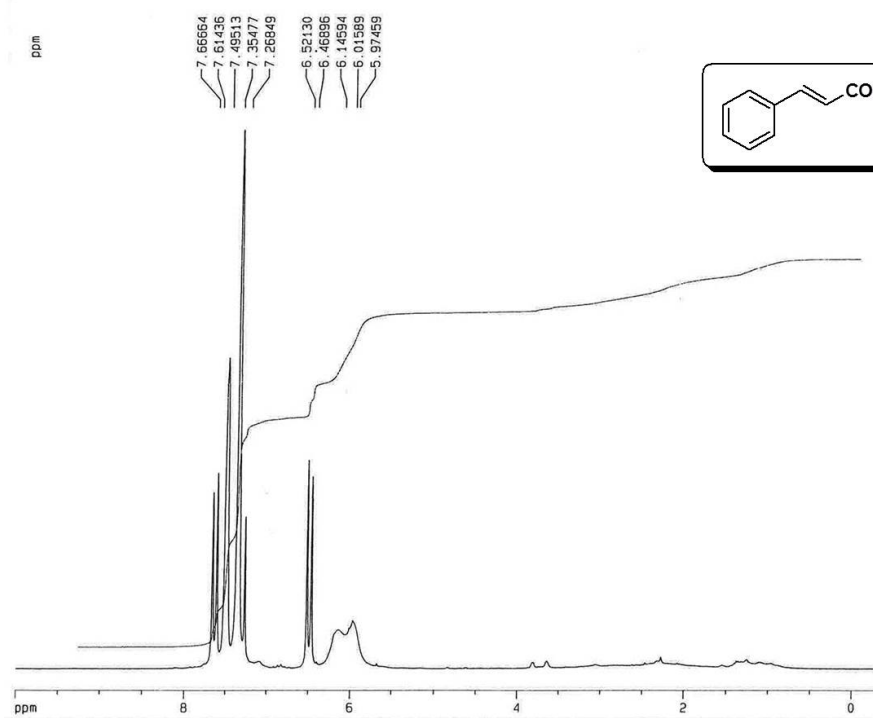

```

Current Data Parameters
NAME      khajenassir
EXPNO    5223
PROCNO   1

F2 - Acquisition Parameters
Date_    20140708
Time     18.42
INSTRUM  spect
PROBHD   5 mm Multinucl
PULPROG  zg
TD        32768
SOLVENT  CDCl3
NS        8
DS        2
SWH       6172.839 Hz
FIDRES   0.188380 Hz
AQ        2.6542580 sec
RG        161.3
DM        81.000 usec
DE        6.00 usec
TE        300.0 K
D1        6.0000000 sec

===== CHANNEL f1 =====
NUC1     1H
P1       10.00 usec
PL1      0.00 dB
SFO1     300.1318008 MHz

F2 - Processing parameters
SI        32768
SF        300.1300039 MHz
WDW       EM
SSB       0
LB        0.30 Hz
GB        0
PC        1.00

1D NMR plot parameters
CX        20.00 cm
CY        12.50 cm
F1P       10.000 ppm
F1        3001.30 Hz
F2P       -0.300 ppm
F2        -90.04 Hz
PPMCH     0.51500 ppm/cm
HZCM      154.56696 Hz/cm
    
```

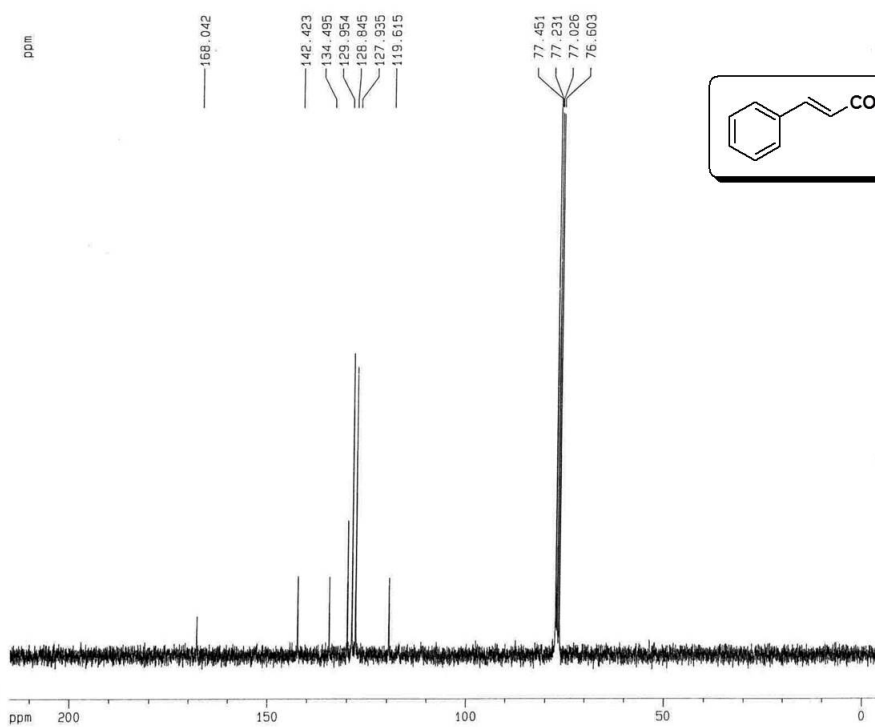

```

Current Data Parameters
NAME      khajenassir
EXPNO    5224
PROCNO   1

F2 - Acquisition Parameters
Date_    20140708
Time     19.13
INSTRUM  spect
PROBHD   5 mm Multinucl
PULPROG  zgpg30
TD        32768
SOLVENT  CDCl3
NS        620
DS        0
SWH       17985.611 Hz
FIDRES   0.548877 Hz
AQ        0.9110004 sec
RG        18390.4
DM        27.800 usec
DE        6.00 usec
TE        333.0 K
D1        2.0000000 sec
d11      0.0300000 sec
d12      0.0000200 sec

===== CHANNEL f1 =====
NUC1     13C
P1       7.00 usec
PL1      -4.00 dB
SFO1     75.4752953 MHz

===== CHANNEL f2 =====
CPDPRG2  waltz16
NUC2     1H
PCPD2    80.00 usec
PL2      0.00 dB
PL12     21.00 dB
PL13     21.00 dB
SFO2     300.1312005 MHz

F2 - Processing parameters
SI        65536
SF        75.4677564 MHz
WDW       EM
SSB       0
LB        1.00 Hz
GB        0
PC        1.40

1D NMR plot parameters
CX        20.00 cm
CY        12.50 cm
F1P       215.000 ppm
F1        16225.57 Hz
F2P       -5.000 ppm
F2        -377.34 Hz
PPMCH     11.00000 ppm/cm
HZCM      622.44220 Hz/cm
    
```

## References

1. R. J. Kalbasi and M. Negahdari, *J. Mol. Struct.*, 2014, **1063**, 259-268.
2. B. Movassagh, S. Yasham and M. Navidi, *Synlett*, 2013, 2671-2674.
3. P. Karthikeyan, P. N. Muskawar, S. A. Aswar, P. R. Bhagat and S. K. Sythana, *J. Mol. Catal. A: Chem.*, 2012, **358**, 112– 120.
4. Y. C. Cui and L. Zhang, *J. Mol. Catal. A: Chem.*, 2005, **237**, 120-125.
5. K. Karami, Z. K. Moghadam and M. Hosseini-Kharat, *Catal. Commun.*, 2014, **43**, 25–28.
6. A. R. Hajipour, F. Rafiee and A. E. Rouho, *Tetrahedron Lett.*, 2011, **52**, 4782–4787.
